**Acute inflammation sensitizes knee-innervating sensory neurons and decreases mouse digging behavior in a TRPV1-dependent manner.**

Sampurna Chakrabarti, Luke A. Pattison, Kaajal Singhal, James R.F. Hockley, Gerard Callejo,  
and Ewan St. John Smith

Department of Pharmacology, University of Cambridge, Cambridge, UK

Corresponding author: Ewan St. John Smith

Department of Pharmacology, University of Cambridge

Tennis Court Road, Cambridge CB2 1PD

Phone: +44 1223 334048, Fax: +44 1223 334100 Email: [es336@cam.ac.uk](mailto:es336@cam.ac.uk), Lab URL:

<https://www.phar.cam.ac.uk/research/Smith>

Number of text pages (w tables and figs): 46

Number of figures: 6

Number of tables: 2

Number of Supplementary materials: 2

1 Abstract

2 Ongoing, spontaneous pain is characteristic of inflammatory joint pain and reduces an  
3 individual's quality of life. To understand the neural basis of inflammatory joint pain, we made a  
4 unilateral knee injection of complete Freund's adjuvant (CFA) in mice, which reduced their natural  
5 digging behavior. We hypothesized that sensitization of knee-innervating dorsal root ganglion  
6 (DRG) neurons underlies this altered behavior. To test this hypothesis, we performed  
7 electrophysiological recordings on retrograde labelled knee-innervating DRG neurons and  
8 measured responses to a number of electrical and chemical stimuli. We found that 24-hours after  
9 CFA-induced knee inflammation, knee neurons show a decreased action potential generation  
10 threshold, as well as increased GABA and capsaicin sensitivity, but have unaltered acid sensitivity.  
11 The inflammation-induced sensitization of knee neurons persisted for 24-hours in culture, but was  
12 not observed after 48-hours in culture. Through immunohistochemistry, we showed that the  
13 increased knee neuron capsaicin sensitivity correlated with enhanced expression of the capsaicin  
14 receptor, transient receptor potential vanilloid 1 (TRPV1) in the CFA-injected side. We also  
15 observed an increase in the co-expression of TRPV1 with tropomyosin receptor kinase A (TrkA),  
16 which is the receptor for nerve growth factor (NGF), suggesting that NGF partially induces the  
17 increased TRPV1 expression. Lastly, we found that systemic administration of the TRPV1  
18 antagonist A-425619 reversed the decrease in digging behavior induced by CFA injection, further  
19 confirming the role of TRPV1, expressed by knee neurons, in acute inflammatory joint pain.

20 (232 words, limit 250)

21

## 22 Introduction

23 Pain is protective, but its dysregulation has a negative impact on an individual's life, as  
24 well as a wider socioeconomic impact [59,65]. Inflammatory joint pain is characteristic of many  
25 musculoskeletal disorders, often being more diffuse and longer lasting than cutaneous pain [42].  
26 Although spontaneous pain is a hallmark of joint pain, most rodent studies focus on evoked pain  
27 behaviors [3,53]. Therefore, shifting the emphasis to study natural behaviors during painful  
28 conditions and their underlying molecular mechanisms might facilitate the translation of novel  
29 analgesics into clinics [3].

30 A variety of techniques have been employed to better understand the molecular drivers of  
31 pain. For example, RNA-sequencing studies have characterized dorsal root ganglia (DRG) neurons  
32 into distinct subpopulations [32,43,64], and electrophysiology and immunohistochemistry have  
33 shown that joint innervating DRG neurons possess distinct neurochemical and  
34 electrophysiological properties [56]. These reports highlight the importance of specifically  
35 studying knee neurons, to fully understand the neural basis of joint pain.

36 Multiple ion channels are involved in transducing noxious stimuli; of these, the Transient  
37 Receptor Potential (TRP) channel family are critical to nociceptor chemosensitivity [45].  
38 Alongside endogenous mediators released during inflammation, e.g. protons, we have shown that  
39 articular neurons can be activated by the TRP channel agonists capsaicin (TRPV1),  
40 cinnamaldehyde (TRPA1) and menthol (TRPM8) [56]. In relation to this, TRPV1<sup>-/-</sup> and TRPA1<sup>-/-</sup>  
41 mice show reduced pain behavior in CFA models of articular nociception [12,19]. Although not  
42 tested after CFA-induced joint inflammation, TRPM8<sup>-/-</sup> mice develop similar mechanical  
43 hyperalgesia to wildtype mice following CFA injection into the footpad [8]. Joint acidosis  
44 correlates with increased severity of inflammatory arthritis in humans, and acidic solutions activate

45 and sensitize rodent nociceptors [18,58]. Mice lacking the proton-gated ion channels acid-sensing  
46 ion channel 3 (ASIC3) and TRPV1 have reduced mechanical hyperalgesia following intra-articular  
47 CFA injection [35], but not following subcutaneous hind paw CFA injection, suggesting regional  
48 differences in pain processing [60]. Subsequently, using magnetic resonance spectroscopic  
49 imaging, we found no evidence of tissue acidosis following subcutaneous CFA injection [69],  
50 suggesting absence of a key stimulus for ASIC3/TRPV1 activation, hence perhaps explaining the  
51 lack of phenotype observed in the hind paw CFA model. However, it remains unknown how  
52 proton-gated channels contribute to knee neuron activation during acute inflammation.

53         Regardless of the stimulus, once activated, sensory neuron input to the spinal cord is pre-  
54 synaptically modulated by GABA<sub>A</sub> receptor signaling, the source of GABA being spinal cord  
55 interneurons [63]. In adults, due to the high intracellular [Cl<sup>-</sup>] in DRG neurons compared to central  
56 nervous system neurons, activation of GABA<sub>A</sub> receptors produces depolarization through [Cl<sup>-</sup>]  
57 efflux [11]. Furthermore, after subcutaneous CFA-induced inflammation in rat paws, the  
58 magnitude of GABA-evoked currents is increased in cutaneous DRG neurons [75], as well as in  
59 isolated human DRG neurons incubated in an inflammatory soup [73]. However, the  
60 characteristics of GABA-evoked currents in knee neurons, and their modulation during  
61 inflammation are unknown.

62         Here, we hypothesized that sensitization of knee-innervating neurons following CFA-  
63 induced knee inflammation underlies changes in natural behavior.

64 (485 words, limit 500 words)

65

66

67 Methods

68 *Animals*

69 All mice used in this study were 6-15 week old female C57/BL6 (Envigo); female mice  
70 were used because being female is a risk factor for inflammatory pain [28]. Mice were  
71 conventionally housed in groups of 4-5 with nesting material and a red plastic shelter; the holding  
72 room was temperature controlled (21 °C) and mice were on a normal 12 hour/light dark cycle with  
73 food and water available *ad libitum*. This research was regulated under the Animals (Scientific  
74 Procedures) Act 1986 Amendment Regulations 2012 following ethical review by the University  
75 of Cambridge Animal Welfare and Ethical Review Body.

76

77 *Knee joint intra-articular injections*

78 Under anesthesia (ketamine, 100 mg/kg and xylazine, 10 mg/kg, i.p.) a single injection of  
79 the retrograde tracer Fast Blue (FB; 1.5 µl 2% in 0.9 % saline; Polysciences) was made intra-  
80 articularly through the patellar tendon into each knee to label knee-innervating neurons. For all  
81 experiments, anaesthetized mice were injected with 7.5 µl Complete Freund's adjuvant (CFA; 10  
82 mg/ml; Chondrex) intra-articularly through the patellar tendon in one knee seven days after  
83 administration of FB. Knee width was measured with Vernier's calipers before and 24-hours after  
84 CFA injection.

85

86 *Digging behavior paradigm*

87 Digging behavior testing was carried out in a subset of mice used for electrophysiological  
88 and immunohistochemistry studies. A standard 49 x 10 x 12 cm cage with a wire lid, filled with

89 Aspen midi 8/20 wood chip bedding (LBS Biotechnology) tamped down to a depth of ~ 4 cm, was  
90 used as the test environment. Each mouse was tested individually using fresh bedding. Testing  
91 lasted three minutes and to avoid distractions food and water were not available. All digging  
92 experiments were carried out between 12:00 and 14:00 on weekdays in the presence of one male  
93 and one female experimenter.

#### 94 **Testing protocol for assessing the impact of CFA-induced inflammation:**

95 Each day before assessment of digging, mice were habituated in the procedure room, in  
96 their home cage, for 30 min. On the training days (2 days before FB or CFA injection in the knee,  
97 Figure 1A) mice were allowed to dig twice, with a 30-minute break between sessions. All  
98 subsequent days were test days and after habituation mice were allowed to dig once. Test digs  
99 were recorded and the digging duration (time spent actively displacing bedding material), as well  
100 as the number of visible burrows in test cages were counted. Digging duration was scored  
101 independently by the two experimenters from video recordings. Since the scores were well  
102 correlated (Pearson correlation  $R^2 = 0.93$ ), an average is reported.

#### 103 **Testing protocol for assessing the effect of TRPV1-antagonist, A-425619:**

104 Seventeen mice were trained as above and the day before CFA knee injections their digging  
105 behavior was measured twice with a 30 min interval in between. Since the digging duration (saline  
106 group: Run 1,  $30.3 \pm 18.7$  s vs. Run 2,  $33.8 \pm 17.0$  s; CFA group: Run 1,  $32.2 \pm 16.2$  s vs. Run 2,  
107  $31.1 \pm 19.4$  s,  $p = 0.8$ ,  $n = 10$ ,  $p = 0.7$ ,  $n = 7$ , paired t-test) and number of burrows (saline group:  
108 Run 1,  $3.4 \pm 0.9$  vs. Run 2,  $3.4 \pm 0.9$ ; CFA group, Run 1,  $4 \pm 0.9$  vs. Run 2,  $4.3 \pm 1.2$ ,  $p = 0.3$ ,  $n$   
109  $= 10$ ,  $p > 0.9$ ,  $n = 7$ , paired t-test) did not change between these two test digs for either group, the  
110 measurement from the second run is reported as pre-CFA/saline. On the day of the injection, the

111 mice were randomly split into two groups: the CFA group received CFA in one knee (as described  
112 above) and the control group received saline in one knee. 24-hours after the injections, digging  
113 activity was re-assessed, after which all mice received an intra-peritoneal dose of the TRPV1  
114 antagonist, A-425619 (100  $\mu$ mol/kg, Tocris, made up in 10% DMSO and 34% 2-hydroxypropyl  
115  $\beta$ -cyclodextrin, Sigma-Aldrich, in dH<sub>2</sub>O). Digging activity was measured again after 30 min as  
116 previous reports show maximal anti-nociceptive effect of A-425619 at this time point [31]. At the  
117 end of the study all the videos of test digs were independently assessed by the experimenters, who  
118 were blinded to the treatment conditions and stage of the experiment by an assistant, and an  
119 average of their scores is reported.

120

#### 121 *DRG neuron culture*

122 Following cervical dislocation and decapitation, the spinal column was dissected and the  
123 lumbar (L2 to L5) DRG (that primarily innervate the knee joint) were collected [49,56]. DRG from  
124 the CFA-injected and non-injected sides were separately collected in ice cold dissociation media  
125 containing L-15 Medium (1X) + GlutaMAX-1 (Life Technologies), supplemented with 24 mM  
126 NaHCO<sub>3</sub>. DRG were then incubated in 3 ml type 1A collagenase (1 mg/ml with 6 mg/ml bovine  
127 serum albumin (BSA) in dissociation media; Sigma-Aldrich) for 15 min at 37 °C, followed by 30  
128 min incubation in 3 ml trypsin solution (1 mg/ml with 6 mg/ml BSA in dissociation media; Sigma-  
129 Aldrich) at 37 °C. After removing the enzymes, the DRG were suspended in culture media  
130 containing L-15 Medium (1X) + GlutaMAX-1, 10 % (v/v) fetal bovine serum, 24 mM NaHCO<sub>3</sub>,  
131 38 mM glucose, 2 % penicillin/streptomycin, dissociated by mechanical trituration with a 1 ml  
132 Gilson pipette and briefly centrifuged (160 g, 30 s; Biofuge primo, Heraeus Instruments; Hanau,

133 Germany). Supernatants containing dissociated DRG neurons were then collected in a fresh tube.  
134 This was repeated five times. Finally, the cells were plated onto poly-D-lysine and laminin coated  
135 glass bottomed dishes (MatTek, P35GC-1.5-14-C) and incubated (37 °C, 5 % CO<sub>2</sub>) for 4-, 24- or  
136 48-hours depending upon the experiment.

137

### 138 *Immunohistochemistry*

139 FB labelled and CFA-injected mice were transcardially perfused, firstly with PBS,  
140 followed by 4 % (w/v) paraformaldehyde (PFA; in PBS, pH 7.4) under terminal anesthesia  
141 (sodium pentobarbital; 200 mg/kg, i.p.). L2 – L5 DRG were collected from the ipsilateral and  
142 contralateral sides and post-fixed for 1-hour (4 % PFA), followed by an overnight incubation in  
143 30 % (w/v) sucrose (in PBS) at 4 °C for cryoprotection. DRG were next embedded in Shandon M-  
144 1 Embedding Matrix (Thermo Fisher Scientific), snap frozen in 2-methylbutane (Honeywell  
145 International) on dry ice and stored at -80 °C. Embedded DRG were sectioned (12 µm) using a  
146 Leica Cryostat (CM3000; Nussloch, Germany), mounted on Superfrost Plus microscope slides  
147 (Thermo Fisher Scientific) and stored at -20 °C until staining. One to three sections were chosen  
148 at random for analysis from each CFA-injected and contralateral side of four mice.

149 Slides were defrosted, washed with PBS-tween and blocked in antibody diluent solution:  
150 0.2 % (v/v) Triton X-100, 5 % (v/v) donkey serum and 1 % (v/v) bovine serum albumin in PBS  
151 for 1-hour at room temperature before overnight incubation at 4 °C with primary antibodies anti-  
152 TRPV1 (1:1000, rabbit polyclonal, Abcam ab31895) and anti-TrkA (1:1000, goat polyclonal,  
153 R&D systems AF1056) in antibody diluent. Slides were washed three times using PBS-tween and  
154 incubated with species-specific conjugated secondary antibodies (1:1000, anti-rabbit Alexa-488



155 (Invitrogen, A21206) and anti-goat Alexa-568 (Invitrogen, A11057)) for 2-hours at room  
156 temperature (20-22 °C). Slides were washed in PBS-tween, mounted and imaged with an Olympus  
157 BX51 microscope (Tokyo, Japan) and QImaging camera (Surrey, Canada). Exposure levels were  
158 kept constant for each slide and the same contrast enhancements were made to all slides. Negative  
159 controls without the primary antibody showed no staining with either secondary.

160         Using ImageJ, the mean gray value of each neuron in a DRG section was measured and  
161 normalized between the highest and lowest intensity neuron for that section. The threshold used  
162 for scoring a neuron as positive for a stain was set as the normalized minimum gray value across  
163 all sections + 2 times SD.

164

#### 165 *Whole cell patch-clamp electrophysiology*

166         At least three DRG neurons from the CFA-injected side (CFA) and contralateral (Cntrl)  
167 side from each animal were recorded. To try and maintain an even distribution of animals across  
168 all time points at which recordings were made, the same culture was used for 4-hours, 24-hours  
169 and 48-hours wherever possible, however, due to the paucity of labelled neurons and variability of  
170 culture conditions, this was not possible in some cases. In total, each of the conditions contained  
171 DRG neurons from 6-8 mice. At each time point recordings were made for 4 hours. The  
172 extracellular solution contained (in mM): NaCl (140), KCl (4), MgCl<sub>2</sub> (1), CaCl<sub>2</sub> (2), glucose (4)  
173 and HEPES (10) adjusted to the required pH (> 6.0) with NaOH. For solutions with pH < 6.0, MES  
174 was used instead of HEPES. Patch pipettes of 4-9 MΩ were pulled with a P-97 Flaming/Brown  
175 puller (Sutter Instruments; Novato, CA, USA) from borosilicate glass capillaries and the  
176 intracellular solution used contained (in mM): KCl (110), NaCl (10), MgCl<sub>2</sub> (1), EGTA (1),

177 HEPES (10), Na<sub>2</sub>ATP (2), Na<sub>2</sub>GTP (0.5) adjusted to pH 7.3 with KOH. Recordings were made  
178 using a HEKA EPC-10 amplifier (Lambrecht, Germany) and the corresponding Patchmaster  
179 software. FB labelled neurons were identified by their fluorescence upon excitation with a 365nm  
180 LED (Cairn Research; Faversham, United Kingdom). For all experiments, DRG neurons were held  
181 at -60 mV and whole cell currents were acquired at 20 kHz. Only neurons where an action potential  
182 (AP) could be evoked in response to current injections and had a resting membrane potential more  
183 negative than -40 mV were analyzed. Images of neurons were captured using a 40x objective on a  
184 Nikon Eclipse Ti-S microscope and a Zyla 5.5 sCMOS camera (Andor; Belfast, United Kingdom),  
185 followed by pixel to  $\mu\text{m}$  conversion to calculate their diameter using ImageJ software.

#### 186 **Testing Protocols:**

187 **Action potential generation:** APs were generated by 80 ms current injections of 0-1050 pA in 50  
188 pA steps. Threshold, amplitude, half peak duration (HPD) and afterhyperpolarisation duration  
189 (AHP) (shown in Figure 2A) were measured using Fitmaster software (HEKA).

190 **Acid sensitivity and TRP-agonist sensitivity:** Solutions for determining acid sensitivity (pH 7,  
191 pH 6, pH 5) and TRP-agonist sensitivity (capsaicin, cinnamaldehyde and menthol) were applied  
192 in a random order to DRG neurons in 5 s pulses with at least 30 s wash period (with pH 7.4)  
193 between stimuli. Solutions of 10  $\mu\text{M}$  capsaicin (1 mM stock in 100% ethanol; Sigma-Aldrich),  
194 100  $\mu\text{M}$  cinnamaldehyde (10 mM stock in 100% ethanol; Merck) and 100  $\mu\text{M}$  menthol (20 mM  
195 stock in 100% ethanol; Alfa Aesar) were made up in pH 7.4 extracellular solution from their  
196 respective stock solutions. Current amplitude was measured in Fitmaster (HEKA) by subtracting  
197 the maximum peak response from the baseline (average of the first 3 s before stimulation), which  
198 was then normalized by dividing by neuron capacitance to give current density.

199 **GABA sensitivity:** 100  $\mu$ M GABA (100 mM stock in water; Sigma-Aldrich) was applied for 5 s  
200 followed by a 20 s wash with pH 7.4, then 100  $\mu$ M GABA and 250  $\mu$ M bicuculline (100 mM in  
201 DMSO; Sigma-Aldrich) were applied together for 5 s. Recovery from bicuculline block was  
202 assessed after 1 min by a subsequent 100  $\mu$ M GABA application for 5 s. To test for the presence  
203 of the GABA<sub>A</sub>- $\delta$  subunit, 100  $\mu$ M of the  $\delta$  agonist 4,5,6,7-tetrahydroisoxazolo[5,4-c]pyridin-3-ol  
204 hydrochloride (THIP, 100 mM stock in water; Sigma-Aldrich) was applied for 5 s.

205

#### 206 *Statistical Analysis*

207 Comparison of CFA and Cntrl neuron electrophysiological properties was performed using  
208 a Student's unpaired t-test (two-sided), while comparison across time (4-hours, 24-hours and 48-  
209 hours) was made using a one-way ANOVA followed by a Holm-Sidak multiple comparison test.  
210 To compare proportions in patch-clamp and immunostaining experiments, a chi-squared test was  
211 used. Knee width before and after inflammation with CFA was compared using a Student's paired  
212 t-test (two-sided). Digging behavior of mice in different groups was compared using a repeated  
213 measures one-way ANOVA followed by a Holm-Sidak multiple comparison test. Data are  
214 presented as mean  $\pm$  standard deviation.

215

216

217

218

219

## 220 Results

### 221 *Inflammation and reduced well-being in mice after unilateral knee joint CFA injection*

222 Injection of CFA into the knee joint produces acute and chronic inflammatory pain in mice  
223 that models human arthritis [26]. To produce acute inflammation, 7-days after labelling knee-  
224 innervating neurons by FB injection, CFA was injected into the left knee joint of mice (Figure 1A).  
225 After 24-hours, we observed robust swelling indicative of edema and inflammation of the  
226 ipsilateral knee (pre-CFA,  $3.8 \pm 0.3$  mm vs. post-CFA,  $4.6 \pm 0.3$  mm,  $p < 0.0001$ ,  $n = 17$ , paired t-  
227 test), but not the contralateral knee (pre-CFA,  $3.7 \pm 0.3$  mm vs. post-CFA,  $3.7 \pm 0.2$  mm,  $n = 17$ ,  $p$   
228  $> 0.9$ , paired t-test, Figure 1B, 1C); a pilot study found that FB injection alone induced no change  
229 in knee width ( $n = 6$ , pre-FB,  $3.9 \pm 0.1$  mm, post-FB,  $4.0 \pm 0.1$  mm,  $p = 0.4$ , paired t-test)

230 Spontaneous pain is one of the most distressing features of arthritic conditions that reduces  
231 the overall feeling of well-being [24,29] and it has been suggested that burrowing and digging  
232 behaviors function as indicators of well-being in mice, such that a reduction in burrowing behavior  
233 during inflammatory pain indicates diminished well-being [15,38]. Based on this hypothesis, we  
234 measured digging behavior in a subset of mice ( $n = 7$ , timeline Figure 1A, see Video,  
235 Supplementary Digital Content 1, which demonstrates post-FB and post-CFA of a mouse). During  
236 a 3-minute test period, neither the time spent digging (pre-FB,  $45.8 \pm 15.8$  s vs. post-FB,  $39.8 \pm$   
237  $12.4$  s,  $t = 1.1$ , ANOVA, Holm-Sidak's multiple comparison test, Figure 1D), nor the number of  
238 burrows dug (pre-FB,  $3.8 \pm 0.7$  vs. post FB,  $3.7 \pm 0.5$ ,  $t = 0.5$ , ANOVA, Holm-Sidak's multiple  
239 comparison test, Figure 1E) was altered following FB injection. However, CFA injection resulted  
240 in decreased digging time (pre-CFA,  $52.7 \pm 23.9$  s vs. post-CFA,  $17.9 \pm 18.4$  s,  $p = 0.003$ ,  $t = 3.9$ ,  
241 ANOVA, Holm-Sidak's multiple comparison test, Figure 1D) and a decreased number of burrows  
242 dug (pre-CFA,  $4.3 \pm 0.5$  vs. post-CFA,  $2.1 \pm 0.9$ ,  $p = 0.0003$ ,  $t = 6.3$ , ANOVA, Holm-Sidak's

243 multiple comparison test, Figure 1E), suggesting a significant impact to well-being, elicited by  
244 joint inflammation. Comparison of post-FB and post-CFA time points also showed that CFA-  
245 injection produced a reduction in the time spent digging ( $p = 0.003$ ,  $t = 4.8$ , ANOVA, Holm-  
246 Sidak's multiple comparison test) and in the number of burrows dug ( $p = 0.0003$ ,  $t = 4.2$ , ANOVA,  
247 Holm-Sidak's multiple comparison test).

248

249 *Action potential threshold of knee neurons decreases after intra-articular CFA injection.*

250 To determine if altered sensory input may underlie the inflammation-induced decrease in  
251 digging behavior observed, we characterized the electrical properties of knee-innervating DRG  
252 neurons isolated from mice undergoing unilateral CFA knee injection as above (CFA neurons);  
253 DRG neurons innervating the contralateral knee were used as control (Cntrl neurons). *In vivo*  
254 recordings from rat joint afferents have shown increased excitability during inflammation [27].  
255 Therefore, we hypothesized that AP threshold would decrease in mouse knee neurons following  
256 CFA-injection.

257 We recorded electrically-evoked APs from CFA neurons (Figure 2A) (CFA,  $n = 25$ ) and  
258 Cntrl neurons ( $n = 27$ ) with similar diameters (Figure 2B, Table 1) after 4-hours in culture. The  
259 AP threshold of CFA neurons was  $\sim 30\%$  lower compared to Cntrl neurons ( $p = 0.01$ , unpaired t-  
260 test) (Figure 2C, Table 1), suggesting hyperexcitability and sensitization of these neurons. By  
261 contrast, there was no change in the HPD ( $p = 0.3$ , unpaired t-test, Figure 2D) or amplitude ( $p =$   
262  $0.7$ , unpaired t-test, Table 1) of the electrically-evoked APs following inflammation, whilst the  
263 AHP increased ( $p = 0.009$ , unpaired t-test, Figure 2E).

264

265 *Acid-sensitivity does not change in knee neurons following inflammation.*

266 Tissue acidosis occurs in some forms of inflammation in humans [18,23], and in rodents  
267 there are also contrasting findings [2,69]. We used a range of pH solutions to determine if knee  
268 neuron acid-sensitivity changes following knee CFA injection. Depending upon the pH stimulus  
269 used, virtually all neurons responded with an inward current (pH 7 =  $80.6 \pm 4.6$  %, pH 6 =  $98.0 \pm$   
270  $2.0$  % and pH 5 = 100 %). A small proportion of neurons showed a rapidly activating transient  
271 inward current followed by a sustained phase (transient + sustained) at pH 6 and pH 5. These  
272 currents were likely mediated by acid-sensing ion channels (ASICs) and their frequency was  
273 unaltered in CFA neurons (CFA,  $16.3 \pm 3.7$  %; Cntrl,  $11.1 \pm 3.7$  %, combined mean of pH 6 and  
274 pH 5) (Figure 3A, 3B). Sustained currents were the dominant response at all the pH tested (Figure  
275 3A, C) and no difference was observed in the amplitude of response to any pH stimulus between  
276 CFA and Cntrl neurons (Figure 3D-F, Table 2). Overall, this suggests that there was no significant  
277 change in acid sensitivity in articular neurons during acute inflammation.

278

279 *Inflammation increases the proportion of TRPV1 expressing knee neurons.*

280 Sensory neurons express a variety of TRP channels involved in thermo- and chemosensing  
281 and these are both activated and sensitized by a range of inflammatory mediators [45]. To  
282 determine if any change in TRP-mediated chemosensitivity occurs in knee neurons following acute  
283 inflammation, we tested 10  $\mu$ M capsaicin, 100  $\mu$ M cinnamaldehyde and 100  $\mu$ M menthol, agonists  
284 of TRPV1, TRPA1 and TRPM8 respectively.

285 The percentage of capsaicin-sensitive CFA neurons increased significantly compared to  
286 Cntrl neurons (CFA, 72 % vs. Cntrl, 44 %,  $p = 0.02$ , chi-sq test, Figure 4A). However, there was

287 no change in the peak current density of capsaicin-evoked currents ( $p = 0.3$ , unpaired t-test, Table  
288 2). By contrast, no change in the percentage of cinnamaldehyde-sensitive (CFA, 40 %, Cntrl, 67  
289 %  $p = 0.06$ ; chi-sq test, Figure 4B) or menthol-sensitive neurons (CFA, 35 %, Cntrl, 51 %,  $p = 0.2$ ,  
290 chi-sq test, Figure 4C) was observed, nor was there any difference in the peak current density of  
291 either cinnamaldehyde- or menthol-evoked currents following inflammation (Table 2,  
292 cinnamaldehyde,  $p = 0.1$ ; menthol,  $p = 0.8$ , unpaired t-test). An increased proportion of knee DRG  
293 neurons responding to capsaicin in inflammation suggests recruitment of a previously capsaicin  
294 “silent” population (Figure 4D).

295 To confirm that an increase in the proportion of capsaicin sensitive knee neurons is due to  
296 increased TRPV1 expression, we conducted immunohistochemistry on whole DRG sections (L2-  
297 L5) from ipsilateral (CFA,  $n = 1089$  neurons) and contralateral (Cntrl,  $n = 1334$  neurons) sides of  
298 four mice (Figure 4Ei). A significantly higher proportion of CFA neurons displayed TRPV1  
299 expression (59.7%) compared to Cntrl neurons (44.6 %,  $p < 0.0001$ , chi-sq test, Figure 4Eii). Nerve  
300 growth factor (NGF) is an important inflammatory mediator implicated in arthritis that binds to its  
301 high affinity receptor tropomyosin receptor kinase A (TrkA) and can increase TRPV1 expression  
302 [37]. Hence, we hypothesized that the increased TRPV1 expression observed will occur in TrkA  
303 positive neurons, leading to increased TRPV1 and TrkA coexpression. Although, the proportion  
304 of knee neurons expressing TrkA (CFA, 39.3 %, Cntrl, 42.6 %) (Figure 4Eii) was not greater in  
305 CFA neurons than Cntrl neurons, there was a small, yet significant, increase in the proportion of  
306 CFA neurons co-expressing TRPV1 and TrkA compared to Cntrl neurons (CFA, 24.8 %; Cntrl,  
307 29.8 %,  $p = 0.02$ , chi-sq test, Figure 4Eii). Taken together, our data suggests that NGF-TrkA  
308 signaling contributes, alongside as yet unknown pathways, to driving increased TRPV1 expression  
309 following CFA.

310

311 *Sustained GABA<sub>A</sub>-evoked current magnitude increases in knee neurons following inflammation.*

312 An inflammation-induced increase in amplitude of GABA-evoked currents has been  
313 reported in skin-labeled rat DRG neurons, suggesting that altered GABAergic signaling may be  
314 important in inflammatory pain [75]. We observed that 100  $\mu$ M GABA evoked a response in 76  
315 % of CFA and 96 % of Cntrl neurons ( $p = 0.03$ , chi-sq test). Two types of GABA response were  
316 observed. In the first, the current reached a peak within 1.5 s of GABA application and was  
317 classified as transient + sustained (TS). Two subtypes of TS responses were observed: one showing  
318 relatively monophasic desensitization throughout GABA application (Figure 5Ai) and a second  
319 showing a far slower desensitization that produced a more stable sustained phase (Figure 5Aii);  
320 due to the paucity of neurons in the first subgroup and since no response returned to baseline within  
321 5 s, both types were included in the TS group. The second type of GABA-evoked response did  
322 not reach its peak within the first 1.5 s, showed no desensitization and was classified as sustained  
323 (S, Figure 5Aiii). The frequency of TS and S responses in CFA and Cntrl neurons was similar  
324 (CFA: TS, 48 %, S, 28 % vs. Cntrl: TS, 52 %, S, 44 %, Figure 5 Bi). Although no difference in  
325 GABA-evoked peak current density was observed overall between CFA and Cntrl neurons (Figure  
326 5Bii, Table 2), GABA-evoked S type currents were of larger magnitude in CFA than Cntrl neurons  
327 (CFA,  $8.0 \pm 10.7$  pA/pF,  $n = 7$  vs. Cntrl,  $1.1 \pm 2.5$  pA/pF,  $n = 14$ ,  $p = 0.03$ , unpaired t-test), whereas  
328 no such difference was observed for TS type currents (CFA,  $6.7 \pm 8.5$  pA/pF,  $n = 12$  vs. Cntrl,  $6.5$   
329  $\pm 6.8$ ,  $n = 12$ ,  $p = 0.5$ , unpaired t-test) (Figure 5Biii).

330 Due to inflammation producing an increase in the magnitude of S type GABA-evoked  
331 currents, we investigated the subunit composition of these GABA receptors. The GABA<sub>A</sub>  
332 antagonist, bicuculline, inhibited GABA responses by more than 50 % in 6/7 CFA DRG and 8/12



333 Cntrl DRG (Figure 5Ci), with all GABA-evoked currents being sensitive to bicuculline to some  
334 extent. These results concur with the previous observation that a fraction of GABA-evoked  
335 currents in rat DRG neurons is bicuculline insensitive [41]. S type GABA<sub>A</sub> currents can be  
336 mediated by  $\delta$  subunit containing GABA<sub>A</sub> receptors [41] and thus we tested the ability of the  $\delta$   
337 subunit containing GABA<sub>A</sub> receptor agonist THIP to evoke currents in knee neurons. A sustained  
338 current in response to THIP was observed in 4/8 CFA and 6/11 Cntrl neurons, indicating  
339 expression of  $\delta$ -subunit containing GABA<sub>A</sub> receptors in knee neurons (Figure 5Ci, Cii). The peak  
340 current density of THIP-evoked currents was similar ( $p = 0.9$ , unpaired t-test) in CFA ( $0.6 \pm 0.4$   
341 pA/pF) and Cntrl ( $0.5 \pm 0.3$  pA/pF) neurons. However, not all the neurons with S type GABA  
342 response showed THIP sensitivity. Combined with the presence of bicuculline insensitive currents,  
343 the lack of response to THIP in all neurons with S currents suggests expression of either  $\rho$  subunit  
344 containing GABA<sub>A</sub> receptors, or perhaps GABA<sub>B</sub> receptors, both of which produce sustained  
345 currents in response to GABA [10]. Taken together, our data indicates the presence of diverse  
346 GABA<sub>A</sub> receptor subunits in CFA and Cntrl neurons and demonstrates an increase in GABA-  
347 mediated neuronal excitation following knee inflammation.

348

349 *Time-in-culture leads to loss of inflammation-induced sensitization of knee neurons.*

350 The period of time that neurons are left in culture for (time-in-culture) and constituents of  
351 the culture medium can greatly alter neuronal excitability [54,68]. To systematically characterize  
352 the effect of time-in-culture in our system, we repeated the experiments described above on the  
353 CFA and Cntrl knee neurons after 24-hours (CFA,  $n = 25$ ; Cntrl,  $n = 22$ ) and 48-hours (CFA,  $n =$   
354  $23$ ; Cntrl,  $n = 22$ ) in culture.

355 No change was observed in the resting membrane potential, capacitance (Table 1) or AP  
356 amplitude (Table 1, CFA,  $p = 0.4$ , Cntrl,  $p = 0.06$ , ANOVA) across the 3 time points. By contrast,  
357 whereas the AP threshold was similar across time points for CFA knee neurons ( $p = 0.06$ ,  
358 ANOVA), it decreased for Cntrl neurons after 48-hours in culture compared to 24-hours ( $p = 0.03$ ,  
359 ANOVA, Holm-Sidak multiple comparison test, Table 1). Interestingly, the inflammation-induced  
360 decrease in AP threshold of CFA neurons compared to Cntrl neurons that was observed at 4-hours  
361 (Figure 2C) and 24-hours ( $p = 0.002$ , unpaired t-test, Table 1) had disappeared after 48-hours in  
362 culture (Table 1,  $p = 0.44$ , unpaired t-test), which suggests that time-in-culture leads to a loss of  
363 inflammation-induced hyperexcitability. There was also a distinct AP widening characterized by  
364 an increase in both HPD and AHP in the 48-hours group for Cntrl neurons, but just the HPD in  
365 CFA neurons. HPD increased by  $\sim 60\%$  after 48-hours in both CFA ( $p = 0.01$ , ANOVA) and Cntrl  
366 ( $p = 0.007$ , ANOVA) neurons compared to the 4-hours group (Table 1). In Cntrl neurons, AHP  
367 increased by 191% in the 48-hours group compared to 4-hours and 81% compared to 24-hours  
368 group ( $p = 0.0002$ , ANOVA, Holm-Sidak multiple comparison test, Table 1). One CFA and one  
369 Cntrl neuron in the 48-hours culture group were excluded from this analysis because of a highly  
370 different AP waveform that could not be analyzed using the same measurements.

371 With regards to knee neuron acid sensitivity, the percentage of neurons with transient +  
372 sustained currents in response to pH 6 and pH 5 at 24-hours and 48-hours (see Figure,  
373 Supplementary Digital Content 2A showing time-in-culture effects on acid of knee neurons after  
374 inflammation) was similar to that at 4-hours (Figure 3A). Although a largely reversible increase in  
375 pH 7- (CFA and Cntrl) and pH 5-evoked (Cntrl) current amplitude was observed at 24-hours (pH  
376 7: CFA,  $p = 0.005$ ; Cntrl,  $p = 0.0003$ , ANOVA; pH 6: CFA,  $p = 0.06$ ; Cntrl,  $p = 0.08$ , ANOVA;

377 and pH 5: CFA,  $p = 0.06$ ; Cntrl,  $p = 0.008$ , ANOVA) (Table 2), there was no clear trend across  
378 different pH stimuli for either CFA or Cntrl neurons.

379 For knee neuron TRP-mediated chemosensitivity, the CFA-induced increase in the  
380 proportion of capsaicin-sensitive neurons observed at 4-hours was maintained at 24-hours (CFA,  
381 88 % vs. Cntrl, 50%,  $p = 0.004$ , chi-sq test), but was absent in the 48-hours group (CFA, 54.2 %  
382 vs. Cntrl, 43.5 %,  $p = 0.5$ , chi-sq test), a result that further confirms our observations that after 48-  
383 hours in culture the inflammation-induced effects are lost. In addition, the proportion of  
384 cinnamaldehyde (CFA, 33.3 %; Cntrl, 21.7 %) and menthol-sensitive (CFA, 33.3 %; Cntrl, 13.0  
385 %) neurons after 48-hours in culture decreased compared to the other two time points, although  
386 this decrease was only significant in Cntrl neurons (cinnamaldehyde,  $p = 0.0006$ ; menthol,  $p =$   
387  $0.005$ , chi-sq test) (see Figure, Supplementary Digital Content 2B, showing time-in-culture effects  
388 on TRP agonist of knee neurons after inflammation). No significant difference in the peak current  
389 density of TRP agonist-evoked currents was observed across time-in-culture (Table 2).

390 When GABA-evoked currents were split into TS and S types, no changes in the peak  
391 current density were observed between CFA and Cntrl after 24-hours or 48-hours in culture.  
392 However, combining both TS and S currents, CFA neurons had larger amplitude GABA-evoked  
393 currents than Cntrl neurons after 24-hours in culture ( $p = 0.01$ , unpaired t-test, Table 2); an effect  
394 that was not seen in the 48-hours group ( $p = 0.2$ , unpaired t-test, Table 2). Previously, it has been  
395 shown in cultured rat DRG neurons that the proportion of S type GABA-evoked currents increased  
396 with time-in-culture [41], a result replicated here in mouse knee neurons (CFA,  $p = 0.03$ , Cntrl,  $p$   
397  $= 0.02$ , chi-sq test, see Figure, Supplementary Digital Content 2C, showing time-in-culture effects  
398 on GABA sensitivity of knee neurons after inflammation). From this data, we would recommend

399 not using DRG neurons for longer than 28-hours in culture to prevent loss of inflammation-induced  
400 sensitization events.

401

402 *TRPV1 inhibition reverses inflammation induced decrease in digging behavior.*

403 From our characterization of CFA and Cntrl neurons, knee neuron TRPV1 expression  
404 emerged as an important target in CFA-induced knee inflammation. We hypothesized that TRPV1  
405 underlies our observed knee inflammation-induced decrease in digging behavior observed in mice  
406 and that the TRPV1 antagonist A-425619 would thus reverse this decrease. On day 2 of our  
407 experimental timeline (Figure 6A), both the CFA group (n = 10) and saline group (n = 7) spent a  
408 similar amount of time digging (CFA,  $31.1 \pm 19.4$  s; Saline,  $33.8 \pm 17.0$  s) and produced a similar  
409 number of burrows (CFA,  $4.3 \pm 1.2$ ; Saline,  $3.4 \pm 0.9$ ). Following CFA/saline injection, the CFA  
410 group showed an expected decrease in digging duration ( $17.4 \pm 16.4$  s,  $p = 0.001$ ,  $t = 3.6$ , ANOVA,  
411 Holm-Sidak multiple comparison test, Figure 6B), which was reversed 30 min after the injection  
412 of A-425619 ( $36.4 \pm 22.2$  s,  $p = 0.001$ ,  $t = 3.9$ , ANOVA, Holm-Sidak multiple comparison test,  
413 Figure 6B). A similar result was also obtained with the number of burrows (post-CFA,  $2.1 \pm 1.0$ ,  
414  $p < 0.0001$ ,  $t = 5.0$ ; post-Ant,  $4.0 \pm 0.6$ ,  $t = 5.7$ , ANOVA, Holm-Sidak multiple comparison test,  
415 Figure 6C). In contrast, the saline group did not show a decrease in digging behavior 24-hours  
416 after saline injection into the knee (Digging duration,  $33.1 \pm 14.0$  s,  $p = 0.5$ ; # Burrows,  $3.7 \pm 1.4$ ,  
417  $p = 0.7$ , ANOVA, Figure 6D, 6E), further confirming that intra-articular injections do not affect  
418 digging behavior. The TRPV1 antagonist A-425619 also produced no effect on digging behavior  
419 in the saline group (Digging duration,  $25.9 \pm 16.6$  s,  $p = 0.5$ ; # Burrows,  $3.3 \pm 1.1$ ,  $p = 0.7$ , ANOVA,  
420 Figure 6D, 6E), i.e. inhibiting TRPV1 does not interfere with spontaneous digging activity of mice.

421 These results confirm that TRPV1 is an important mediator of inflammatory knee pain and  
422 contributes to the inflammation-induced decrease in digging behavior in mice.

423

424

425

426

427

428

429

430

431

432

433

434

435

436

437

438

439

440 *Discussion*

441 CFA evokes both acute (within 18 hours) and chronic (> 6 weeks) inflammatory pain  
442 [35,39], as demonstrated by altered evoked-pain behaviors, such as hot/cold plate tests. However,  
443 such evoked-pain tests are neither ethologically relevant to rodents, nor model experience of  
444 human chronic pain [48]. Consequently, innate rodent behaviors, such as burrowing, digging and  
445 nest-building that seek to mirror human activities of daily living have been explored as pain assays  
446 [15,38]. A decrease in burrowing behavior has been used to assess pain-like behavior after CFA-  
447 induced knee inflammation in rats [50] and digging is a similar innate behavior that is quick and  
448 easy to test in a laboratory [15]. Here we show that 24-hours after CFA-induced knee  
449 inflammation, mice spent significantly decreased time digging, suggesting that digging can be used  
450 as an ethologically relevant pain assay in mice; importantly, intra-articular injection of the  
451 retrograde tracer FB did not alter digging behavior.

452 To study the neural basis for the inflammation-induced change in behavior observed, we  
453 combined electrophysiology with retrograde labelling of the knee joints, i.e. those neurons exposed  
454 to the inflammatory insult. We found that knee neurons have a decreased AP threshold and  
455 increased AHP following CFA-induced knee inflammation. The recorded increased AHP in CFA  
456 neurons is perhaps contradictory because an increase in current mediated by hyperpolarization-  
457 activated cyclic nucleotide-gated ion channels (HCN), and thus a decrease in AHP, is associated  
458 with repetitive firing, as shown by one study in trigeminal ganglia neurons after CFA-induced  
459 inflammation [22]. However, other studies using CFA-induced hind limb inflammation either  
460 observed no change in AHP (like our data at 24-hours in culture) [17] or reported a decrease in  
461 AHP only in C-fibers [66]. Therefore, our data possibly demonstrates the multifaceted nature of

462 the molecular mechanisms regulating AHP, a suggestion supported by the wide range of AHP  
463 values reported [16,40].

464 TRP channels are cellular sensors of thermal, physical and chemical stimuli [45] and  
465 inflammatory mediators released during joint pain can sensitize TRP channels [71]. TRPV1 [72],  
466 TRPA1 [61] and TRPM8 [5] are expressed in nociceptors and are involved in hyperalgesia.  
467 However, the role of TRPV1 and TRPA1 in acute inflammatory joint pain is unclear. Some studies  
468 report that TRPV1<sup>-/-</sup> mice do not develop CFA- [39] or carrageenan- [14] induced hyperalgesia  
469 and others have shown that in DRG neurons TRPV1 protein expression increases in CFA-induced  
470 inflammation [1,37,70]. In direct contrast, other studies failed to show increased neuronal TRPV1  
471 protein [4,74] or mRNA expression [37] following CFA-induced inflammation. Similarly,  
472 TRPA1<sup>-/-</sup> mice show normal development of CFA-induced hyperalgesia in some studies [20,46],  
473 whereas others report attenuation of CFA- and carrageenan-induced hyperalgesia in TRPA1<sup>-/-</sup> mice  
474 [25,44] or following administration of a TRPA1 antagonist [6,51]. We provide  
475 electrophysiological evidence that the proportion of capsaicin-sensitive knee neurons increases  
476 during acute inflammation from ~ 50% to ~80%, suggesting recruitment of a previously silent  
477 neuronal population. We validate this electrophysiology result through immunohistochemistry,  
478 demonstrating a similar magnitude increase in the proportion of TRPV1 expressing knee neurons;  
479 the observed TRPV1 expression in contralateral knee-innervating neurons reported here agrees  
480 with previous findings in rodents [13]. Multiple mechanisms may contribute to this process, for  
481 example, NGF released from a variety of cell types in arthritic joints may bind to TrkA and get  
482 retrogradely transported to DRG neurons to drive TRPV1 expression. Indeed, increased levels of  
483 NGF are found in rheumatic diseases and anti-NGF/TrkA therapy reduces arthritic pain in human  
484 and animal models (reviewed in [55]). With regard to CFA-induced pain, it has been previously

485 shown that the proportion of TrkA-expressing neurons innervating bone does not increase  
486 following CFA-induced bone pain [52] . We also observed no change in TrkA expression, but did  
487 observe a slight, yet significant, increase in TrkA-TRPV1 co-expression following knee  
488 inflammation which suggests that NGF-TrkA signaling plays a role in the increased TRPV1  
489 expression observed here.

490 Protons are algogens detected by sensory neurons through a variety of means, including  
491 ASICs, TRPV1, background K<sup>+</sup> channels, chloride channels and proton-sensing G-protein coupled  
492 receptors [33]. There is conflicting evidence surrounding the role of ASICs in inflammatory pain,  
493 some studies showing no change, others decreased pain and still others increased pain [47,57]. In  
494 terms of joint inflammation, ASIC3<sup>-/-</sup>, TDAG8<sup>-/-</sup> (a proton-sensing GPCR) and TRPV1<sup>-/-</sup> mice  
495 showed decreased hyperalgesia in an ankle inflammation model [35]. In addition, Ikeuchi *et al*  
496 [36] observed upregulation of ASIC3 immunoreactivity in knee-innervating DRG neurons after  
497 carrageenan-induced acute knee inflammation in mice. By contrast, ASIC1, ASIC2 and ASIC3  
498 knockout mice did not display attenuated thermal or mechanical hyperalgesia after intraplantar  
499 CFA injection, suggesting that these ASIC subunits play no role in cutaneous CFA-induced  
500 hyperalgesia [60]. We evaluated direct proton activation of knee neurons and found that acid-  
501 evoked currents are neither enhanced, nor is there any change in the proportion of ASIC-like  
502 currents, following CFA-induced knee inflammation, results that might explain the lack of  
503 phenotype observed in certain studies.

504 Information transfer from peripheral to central afferents is modulated by GABAergic  
505 signaling. Although an inhibitory neurotransmitter in the central nervous system, GABA produces  
506 membrane depolarization through Cl<sup>-</sup> efflux in DRG neurons owing to the relatively high  
507 intracellular [Cl<sup>-</sup>] [62]. GABA-evoked currents in sensory neurons are predominantly GABA<sub>A</sub>



508 receptor mediated, (identified by their sensitivity to GABA<sub>A</sub> antagonist, bicuculline) with diverse  
509 subunit composition [41]. As shown previously in rat DRG neurons [41], we recorded both  
510 transient and sustained GABA-evoked currents from mouse knee neurons that were largely  
511 inhibited by the GABA<sub>A</sub> antagonist bicuculline. In addition, our finding that approximately half  
512 of all knee neurons were activated by the GABA<sub>A</sub>- $\delta$  subunit agonist, THIP, suggests common  
513 expression of the  $\delta$ -subunit, although the proportion of THIP-activated neurons did not change  
514 after CFA injection. The fact that bicuculline did not completely abolish GABA-evoked currents  
515 indicates the likely presence of  $\rho$  subunits in GABA<sub>A</sub> receptors, as has previously been reported  
516 in rat DRG neurons [41], or the presence of GABA<sub>B</sub> receptor expression (both  $\rho$  containing  
517 GABA<sub>A</sub> receptors and GABA<sub>B</sub> receptors are insensitive to bicuculline block). Under normal  
518 conditions, GABA-mediated excitation of primary afferent neurons causes primary afferent  
519 depolarization, an inhibitory action due to inducing inactivation of voltage gated sodium channels  
520 (i.e. depolarizing block). However, following tissue injury, primary afferent depolarization is  
521 larger and can actually generate AP to produce pain by excitation of presynaptic GABA<sub>A</sub> receptors  
522 [9,67]. In this study, we found a decrease in number of GABA responsive CFA neurons, but an  
523 increase in the magnitude of GABA-evoked currents compared to Cntrl neurons indicating a  
524 potential GABA<sub>A</sub> mediated decrease in presynaptic inhibition and an increase in presynaptic  
525 excitation.

526         Furthermore, we addressed how time-in-culture affects the electrophysiological properties  
527 of neurons isolated from mice undergoing CFA-induced inflammation. Acutely dissociated DRG  
528 neurons have been extensively studied with patch clamp electrophysiology, however the definition  
529 of “acute” varies. While some studies have recorded within 8-hours of dissection, it is more  
530 common to record after overnight incubation (18–28-hours). This variability can potentially

531 confound results on inflammation-induced sensitization, as AP properties change with time-in-  
532 culture. Here we show AP broadening, and a slight decrease in AP threshold in neurons from the  
533 contralateral side as reported before during a similar time course [54]. We also show that time-in-  
534 culture does not affect inflammation-induced lowering of AP threshold up to 28-hours in culture,  
535 but that the lowered threshold is lost at 48-hours in culture. Understanding how time-in-culture  
536 alters neuronal excitability is important for correctly designing studies. For example, we (present  
537 study) and others [41] have shown that S type GABA-evoked responses increase in prevalence  
538 with time-in-culture. The present study also shows a decline in the frequency of response to  
539 capsaicin, cinnamaldehyde and menthol and the inflammation-induced increase in frequency of  
540 capsaicin-sensitive neurons, although maintained for up to 28-hours in culture is lost after 48-  
541 hours. By contrast, acid-sensitivity remained relatively stable across all time points.

542 In summary, we show that following unilateral acute inflammation of the knee, knee  
543 neurons have 1) a lower AP threshold 2) increased sensitivity to capsaicin and expression of  
544 TRPV1 and 3) an increasing trend in the magnitude of GABA-evoked currents up to 28-hours in  
545 culture. This specific sensitization signature of knee neurons highlights the importance of studying  
546 DRG neurons as a spatially heterogeneous group. Among these different modes of sensitization  
547 that likely contribute to the decreased mouse digging behavior following knee inflammation, an  
548 increase in TRPV1 function is perhaps most clinically relevant to inflammatory arthritis (reviewed  
549 in [21]). Indeed, it has recently been shown that intra-articular administration of a TRPV1  
550 antagonist attenuated early osteoarthritic pain in a mono-sodium iodoacetate model [30].  
551 Historically in pre-clinical models, TRPV1 antagonists attenuated thermal hyperalgesia, but their  
552 efficacy in mechanical hyperalgesia and ongoing pain is unclear [7]. The peripherally restricted  
553 TRPV1 antagonist, A-425619, has been previously shown to reverse thermal and mechanical

554 hypersensitivity in rat CFA models and also restore weight bearing ability in rat osteoarthritis  
555 models [34]. Here we report that systemic administration of A-425619 is also able to restore the  
556 reduction in spontaneous digging behavior in mice brought about by CFA-induced knee  
557 inflammation, which further establishes TRPV1 as an important drug target in inflammatory joint  
558 pain.

559 (1491 words, limit 1500)

560

561

562

563

564

565

566

567

568

569

570

571

572

573 Acknowledgments

574 The authors would like to thank Julie Gautrey and Chris Cardinal for technical assistance with  
575 animal work. This work was supported by an Arthritis Research UK Grant (G.C. and E.St.J.S., RG  
576 20930), a Rosetrees Postdoctoral Grant (J.R.F.H. and E.St.J.S., A1296), S.C. was supported by a  
577 Gates Cambridge Trust scholarship and L.A.P. was supported by the University of Cambridge  
578 BBSRC Doctoral Training Programme (BB/M011194/1).

579 The authors declare no conflict of interest regarding information in the present report.

580

581

582

583

584

585

586

587

588

589

590 References

- 591 [1] Amaya F, Oh-hashii K, Naruse Y, Iijima N, Ueda M, Shimosato G, Tominaga M, Tanaka  
592 Y, Tanaka M. Local inflammation increases vanilloid receptor 1 expression within distinct  
593 subgroups of DRG neurons. *Brain Research* 2003;963:190–196.
- 594 [2] Andersson SE, Lexmuller K, Johansson A, Ekstrom GM. Tissue and intracellular pH in  
595 normal periarticular soft tissue and during different phases of antigen induced arthritis in  
596 the rat. *J Rheumatol* 1999;26:2018–2024.
- 597 [3] Arendt-Nielsen L. Joint pain: more to it than just structural damage? *PAIN* 2017;158.
- 598 [4] Bär K-J, Schaible H-G, Bräuer R, Halbhuber K-J, von Banchet GS. The proportion of  
599 TRPV1 protein-positive lumbar DRG neurones does not increase in the course of acute  
600 and chronic antigen-induced arthritis in the knee joint of the rat. *Neuroscience Letters*  
601 2004;361:172–175.
- 602 [5] Behrendt H-J, Germann T, Gillen C, Hatt H, Jostock R. Characterization of the mouse  
603 cold-menthol receptor TRPM8 and vanilloid receptor type-1 VR1 using a fluorometric  
604 imaging plate reader (FLIPR) assay. *British Journal of Pharmacology* 2004;141:737–745.
- 605 [6] Bonet IJM, Fischer L, Parada CA, Tambeli CH. The role of transient receptor potential A  
606 1 (TRPA1) in the development and maintenance of carrageenan-induced hyperalgesia.  
607 *Neuropharmacology* 2013;65:206–212.
- 608 [7] Brandt MR, Beyer CE, Stahl SM. TRPV1 Antagonists and Chronic Pain: Beyond Thermal  
609 Perception. *Pharmaceuticals* 2012;5:114–132.
- 610 [8] Caceres AI, Liu B, Jabba SV, Achanta S, Morris JB, Jordt S. Transient Receptor Potential  
611 Cation Channel Subfamily M Member 8 channels mediate the anti-inflammatory effects of  
612 eucalyptol. *British Journal of Pharmacology* 2017;174:867–879.
- 613 [9] Cervero F, Laird JMA, García-Nicas E. Secondary hyperalgesia and presynaptic  
614 inhibition: an update. *European Journal of Pain* 2003;7:345–351.
- 615 [10] Chebib M, Johnston GAR. The “ABC” of GABA receptors: a brief overview. *Clinical and*  
616 *Experimental Pharmacology and Physiology* 2001;26:937–940.
- 617 [11] Chen W, Walwyn W, Ennes HS, Kim H, McRoberts JA, Marvizón JCG. BDNF released  
618 during neuropathic pain potentiates NMDA receptors in primary afferent terminals. *The*  
619 *European journal of neuroscience* 2014;39:1439–1454.
- 620 [12] Chen Y, Willcockson HH, Valtschanoff JG. Vanilloid receptor TRPV1-mediated  
621 phosphorylation of ERK in murine adjuvant arthritis. *Osteoarthritis and Cartilage*  
622 2009;17:244–251.

- 623 [13] Cho WG, Valtschanoff JG. Vanilloid receptor TRPV1-positive sensory afferents in the  
624 mouse ankle and knee joints. *Brain Research* 2008;1219:59–65.
- 625 [14] Davis JB, Gray J, Gunthorpe MJ, Hatcher JP, Davey PT, Overend P, Harries MH,  
626 Latcham J, Clapham C, Atkinson K, Hughes SA, Rance K, Grau E, Harper AJ, Pugh PL,  
627 Rogers DC, Bingham S, Randall A, Sheardown SA. Vanilloid receptor-1 is essential for  
628 inflammatory thermal hyperalgesia. *Nature* 2000;405:183.
- 629 [15] Deacon RMJ. Digging and marble burying in mice: simple methods for in vivo  
630 identification of biological impacts. *Nature Protocols* 2006;1:122.
- 631 [16] Djouhri L, Bleazard L, Lawson SN. Association of somatic action potential shape with  
632 sensory receptive properties in guinea-pig dorsal root ganglion neurones. *The Journal of*  
633 *Physiology* 1998;513:857–872.
- 634 [17] Djouhri L, Lawson SN. Changes in somatic action potential shape in guinea-pig  
635 nociceptive primary afferent neurones during inflammation in vivo. *The Journal of*  
636 *Physiology* 1999;520:565–576.
- 637 [18] Farr M, Garvey K, Bold AM, Kendall MJ, Bacon PA. Significance of the hydrogen ion  
638 concentration in synovial fluid in rheumatoid arthritis. *Clin Exp Rheumatol* 1985;3:99–  
639 104.
- 640 [19] Fernandes ES, Russell FA, Alawi KM, Sand C, Liang L, Salamon R, Bodkin JV, Aubdool  
641 AA, Arno M, Gentry C, Smillie S-J, Bevan S, Keeble JE, Malcangio M, Brain SD.  
642 Environmental cold exposure increases blood flow and affects pain sensitivity in the knee  
643 joints of CFA-induced arthritic mice in a TRPA1-dependent manner. *Arthritis Research &*  
644 *Therapy* 2016;18:7.
- 645 [20] Fernandes ES, Russell FA, Spina D, McDougall JJ, Graepel R, Gentry C, Staniland AA,  
646 Mountford DM, Keeble JE, Malcangio M, Bevan S, Brain SD. A Distinct Role for  
647 Transient Receptor Potential Ankyrin 1, in Addition to Transient Receptor Potential  
648 Vanilloid 1, in Tumor Necrosis Factor alpha-Induced Inflammatory Hyperalgesia and  
649 Freund's Complete Adjuvant-Induced Monarthritis. *Arthritis and Rheumatism*  
650 2011;63:819–829.
- 651 [21] Fernandes ES, S A, R K, Brain S. TRP Receptors in Arthritis, Gaining Knowledge for  
652 Translation from Experimental Models. 2013 p.
- 653 [22] Flake NM, Gold MS. Inflammation alters sodium currents and excitability of  
654 temporomandibular joint afferents. *Neuroscience Letters* 2005;384:294–299.
- 655 [23] Fujii W, Kawahito Y, Nagahara H, Kukida Y, Seno T, Yamamoto A, Kohno M, Oda R,  
656 Taniguchi D, Fujiwara H, Ejima A, Kishida T, Mazda O, Ashihara E. Monocarboxylate  
657 Transporter 4, Associated With the Acidification of Synovial Fluid, Is a Novel  
658 Therapeutic Target for Inflammatory Arthritis. *Arthritis & Rheumatology* 2015;67:2888–  
659 2896.

- 660 [24] Gareth J. Treharne, George D. Kitas, Antonia C. Lyons, David A. Booth. Well-being in  
661 Rheumatoid Arthritis: The Effects of Disease Duration and Psychosocial  
662 Factors. *J Health Psychol* 2005;10:457–474.
- 663 [25] Garrison SR, Stucky CL. Contribution of Transient Receptor Potential Ankyrin 1 to  
664 Chronic Pain in Aged Mice With Complete Freund’s Adjuvant–Induced Arthritis.  
665 *Arthritis & Rheumatology* 2014;66:2380–2390.
- 666 [26] Gauldie SD, McQueen DS, Clarke CJ, Chessell IP. A robust model of adjuvant-induced  
667 chronic unilateral arthritis in two mouse strains. *J Neurosci Methods* 2004;139:281–291.
- 668 [27] Grubb BD, Birrell GJ, McQueen DS, Iggo A. The role of PGE2 in the sensitization of  
669 mechanoreceptors in normal and inflamed ankle joints of the rat. *Experimental Brain*  
670 *Research* 1991;84:383–392.
- 671 [28] Hannan MT. Epidemiologic perspectives on women and arthritis: An overview. *Arthritis*  
672 *& Rheumatism* 1996;9:424–434.
- 673 [29] Hawker GA, Stewart L, French MR, Cibere J, Jordan JM, March L, Suarez-Almazor M,  
674 Gooberman-Hill R. Understanding the pain experience in hip and knee osteoarthritis – an  
675 OARSI/OMERACT initiative. *Osteoarthritis and Cartilage n.d.*;16:415–422.
- 676 [30] Haywood AR, Hathway GJ, Chapman V. Differential contributions of peripheral and  
677 central mechanisms to pain in a rodent model of osteoarthritis. *Scientific Reports*  
678 2018;8:7122.
- 679 [31] Hillery CA, Kerstein PC, Vilceanu D, Barabas ME, Retherford D, Brandow AM,  
680 Wandersee NJ, Stucky CL. Transient receptor potential vanilloid 1 mediates pain in mice  
681 with severe sickle cell disease. *Blood* 2011;118:3376–3383.
- 682 [32] Hockley JRF, Taylor TS, Callejo G, Wilbrey AL, Gutteridge A, Bach K, Winchester WJ,  
683 Bulmer DC, McMurray G, Smith ESJ. Single-cell RNAseq reveals seven classes of  
684 colonic sensory neuron. *Gut* 2018. doi:10.1136/gutjnl-2017-315631.
- 685 [33] Holzer P. Acid-sensitive ion channels and receptors. *Handbook of experimental*  
686 *pharmacology* 2009:283–332.
- 687 [34] Honore P, Wismer CT, Mikusa J, Zhu CZ, Zhong C, Gauvin DM, Gomtsyan A, El  
688 Kouhen R, Lee C-H, Marsh K, Sullivan JP, Faltynek CR, Jarvis MF. A-425619 [1-  
689 Isoquinolin-5-yl-3-(4-trifluoromethyl-benzyl)-urea], a Novel Transient Receptor Potential  
690 Type V1 Receptor Antagonist, Relieves Pathophysiological Pain Associated with  
691 Inflammation and Tissue Injury in Rats. *J Pharmacol Exp Ther* 2005;314:410.
- 692 [35] Hsieh W-S, Kung C-C, Huang S-L, Lin S-C, Sun W-H. TDAG8, TRPV1, and ASIC3  
693 involved in establishing hyperalgesic priming in experimental rheumatoid arthritis.  
694 *Scientific Reports* 2017;7:8870.

- 695 [36] Ikeuchi M, Kolker SJ, Sluka KA. Acid-sensing ion channel 3 expression in mouse knee  
696 joint afferents and effects of carrageenan-induced arthritis. *J Pain* 2009;10.  
697 doi:10.1016/j.jpain.2008.10.010.
- 698 [37] Ji R-R, Samad TA, Jin S-X, Schmall R, Woolf CJ. p38 MAPK Activation by NGF in  
699 Primary Sensory Neurons after Inflammation Increases TRPV1 Levels and Maintains Heat  
700 Hyperalgesia. *Neuron* 2002;36:57–68.
- 701 [38] Jirkof P. Burrowing and nest building behavior as indicators of well-being in mice.  
702 *Journal of Neuroscience Methods* 2014;234:139–146.
- 703 [39] Keeble J, Russell F, Curtis B, Starr A, Pinter E, Brain SD. Involvement of transient  
704 receptor potential vanilloid 1 in the vascular and hyperalgesic components of joint  
705 inflammation. *Arthritis and Rheumatism* 2005;52:3248–3256.
- 706 [40] Lawson SN, McCarthy PW, Prabhakar E. Electrophysiological properties of neurones  
707 with CGRP-like immunoreactivity in rat dorsal root ganglia. *Journal of Comparative*  
708 *Neurology* 1996;365:355–366.
- 709 [41] Lee KY, Charbonnet M, Gold MS. Upregulation of high affinity GABA(A) receptors in  
710 cultured rat dorsal root ganglion neurons. *Neuroscience* 2012;208C:133–142.
- 711 [42] Lewis T. Study of Somatic Pain. *British Medical Journal* 1938;1:321–325.
- 712 [43] Li C-L, Li K-C, Wu D, Chen Y, Luo H, Zhao J-R, Wang S-S, Sun M-M, Lu Y-J, Zhong  
713 Y-Q, Hu X-Y, Hou R, Zhou B-B, Bao L, Xiao H-S, Zhang X. Somatosensory neuron  
714 types identified by high-coverage single-cell RNA-sequencing and functional  
715 heterogeneity. *Cell Research* 2015;26:83.
- 716 [44] Moilanen LJ, Laavola M, Kukkonen M, Korhonen R, Leppänen T, Högestätt ED,  
717 Zygmunt PM, Nieminen RM, Moilanen E. TRPA1 Contributes to the Acute Inflammatory  
718 Response and Mediates Carrageenan-Induced Paw Edema in the Mouse. *Scientific*  
719 *Reports* 2012;2:380.
- 720 [45] Moore C, Gupta R, Jordt S-E, Chen Y, Liedtke WB. Regulation of Pain and Itch by TRP  
721 Channels. *Neuroscience Bulletin* 2018;34:120–142.
- 722 [46] Petrus M, Peier AM, Bandell M, Hwang SW, Huynh T, Olney N, Jegla T, Patapoutian A.  
723 A role of TRPA1 in mechanical hyperalgesia is revealed by pharmacological inhibition.  
724 *Molecular Pain* 2007;3:40–40.
- 725 [47] Price MP, McIlwrath SL, Xie J, Cheng C, Qiao J, Tarr DE, Sluka KA, Brennan TJ, Lewin  
726 GR, Welsh MJ. The DRASIC Cation Channel contributes to the detection of cutaneous  
727 touch and acid stimuli in mice. *Neuron* 2001;32. doi:10.1016/S0896-6273(01)00547-5.
- 728 [48] Rice ASC, Cimino-Brown D, Eisenach JC, Kontinen VK, Lacroix-Fralish ML, Machin I,  
729 Mogil JS, Stöhr T. Animal models and the prediction of efficacy in clinical trials of



- 730 analgesic drugs: A critical appraisal and call for uniform reporting standards. *PAIN*  
731 2008;139:243–247.
- 732 [49] Rigaud M, Gemes G, Barabas M-E, Chernoff DI, Abram SE, Stucky CL, Hogan QH.  
733 Species and strain differences in rodent sciatic nerve anatomy: Implications for studies of  
734 neuropathic pain. *Pain* 2008;136:188–201.
- 735 [50] Rutten K, Robens A, Read SJ, Christoph T. Pharmacological validation of a refined  
736 burrowing paradigm for prediction of analgesic efficacy in a rat model of sub-chronic  
737 knee joint inflammation. *European Journal of Pain* 2014;18:213–222.
- 738 [51] Samer R Eid, Eric D Crown, Eric L Moore, Hongyu A Liang, Kar-Chan Choong, Shelley  
739 Dima, Darrell A Henze, Stefanie A Kane, Mark O Urban. HC-030031, a TRPA1 Selective  
740 Antagonist, Attenuates Inflammatory- and Neuropathy-Induced Mechanical  
741 Hypersensitivity. *Mol Pain* 2008;4:1744-8069-4–48.
- 742 [52] Sara Nencini, Mitchell Ringuet, Dong-Hyun Kim, Yu-Jen Chen, Claire Greenhill, Jason J  
743 Ivanusic. Mechanisms of nerve growth factor signaling in bone nociceptors and in an  
744 animal model of inflammatory bone pain. *Mol Pain* 2017;13:1744806917697011.
- 745 [53] Schaible H-G, Ebersberger A, von Banchet GS. Mechanisms of Pain in Arthritis. *Annals*  
746 *of the New York Academy of Sciences* 2002;966:343–354.
- 747 [54] Scott BS, Edwards BA. Electric membrane properties of adult mouse DRG neurons and  
748 the effect of culture duration. *J Neurobiol* 1980;11:291–301.
- 749 [55] Seidel MF, Wise BL, Lane NE. Nerve growth factor: an update on the science and  
750 therapy. *Osteoarthritis and Cartilage* 2013;21:1223–1228.
- 751 [56] da Silva Serra I, Husson Z, Bartlett JD, Smith ES. Characterization of cutaneous and  
752 articular sensory neurons. LID - 10.1177/1744806916636387 [doi] LID -  
753 1744806916636387 [pii]. 2016.
- 754 [57] Sluka KA, Price MP, Breese NM, Stucky CL, Wemmie JA, Welsh MJ. Chronic  
755 hyperalgesia induced by repeated acid injections in muscle is abolished by the loss of  
756 ASIC3, but not ASIC1. *Pain* 2003;106. doi:10.1016/S0304-3959(03)00269-0.
- 757 [58] Smith ESJ, Omerbašić D, Lechner SG, Anirudhan G, Lapatsina L, Lewin GR. The  
758 Molecular Basis of Acid Insensitivity in the African Naked Mole-Rat. *Science*  
759 2011;334:1557.
- 760 [59] St. John Smith E. Advances in understanding nociception and neuropathic pain. *Journal of*  
761 *Neurology* 2018;265:231–238.
- 762 [60] Staniland AA, McMahon SB. Mice lacking acid-sensing ion channels (ASIC) 1 or 2, but  
763 not ASIC3, show increased pain behaviour in the formalin test. *European Journal of Pain*  
764 2009;13:554–563.

- 765 [61] Story GM, Peier AM, Reeve AJ, Eid SR, Mosbacher J, Hricik TR, Earley TJ, Hergarden  
766 AC, Andersson DA, Hwang SW, McIntyre P, Jegla T, Bevan S, Patapoutian A.  
767 ANKTM1, a TRP-like Channel Expressed in Nociceptive Neurons, Is Activated by Cold  
768 Temperatures. *Cell* 2003;112:819–829.
- 769 [62] Sung K-W, Kirby M, McDonald MP, Lovinger DM, Delpire E. Abnormal GABA<sub>A</sub>  
770 Receptor-Mediated Currents in Dorsal Root Ganglion Neurons Isolated from Na–K–2Cl  
771 Cotransporter Null Mice. *J. Neurosci.* 2000;20:7531.
- 772 [63] Sutherland FI, Bannatyne BA, Kerr R, Riddell JS, Maxwell DJ. Inhibitory amino acid  
773 transmitters associated with axons in presynaptic apposition to cutaneous primary afferent  
774 axons in the cat spinal cord. *J Comp Neurol* 2002;452:154–162.
- 775 [64] Usoskin D, Furlan A, Islam S, Abdo H, Lonnerberg P, Lou D, Hjerling-Leffler J,  
776 Haeggstrom J, Kharchenko O, Kharchenko PV, Linnarsson S, Ernfors P. Unbiased  
777 classification of sensory neuron types by large-scale single-cell RNA sequencing. *Nat*  
778 *Neurosci* 2015;18:145–153.
- 779 [65] Vilen L, Baldassari AR, Callahan LF. Socioeconomic burden of pain in rheumatic disease.  
780 *Clin Exp Rheumatol* 2017;35 Suppl 107:26–31.
- 781 [66] Weng X, Smith T, Sathish J, Djouhri L. Chronic inflammatory pain is associated with  
782 increased excitability and hyperpolarization-activated current (I<sub>h</sub>) in C- but not Aδ-  
783 nociceptors. *PAIN®* 2012;153:900–914.
- 784 [67] Willis WDJ. Dorsal root potentials and dorsal root reflexes: a double-edged sword. *Exp*  
785 *Brain Res* 1999;124:395–421.
- 786 [68] Winter J, Alistair Forbes C, Sternberg J, Lindsay RM. Nerve growth factor (NGF)  
787 regulates adult rat cultured dorsal root ganglion neuron responses to the excitotoxin  
788 capsaicin. *Neuron* 1988;1:973–981.
- 789 [69] Wright AJ, Husson ZMA, Hu D-E, Callejo G, Brindle KM, Smith ESJ. Increased  
790 hyperpolarized [1-13C] lactate production in a model of joint inflammation is not  
791 accompanied by tissue acidosis as assessed using hyperpolarized 13C-labelled  
792 bicarbonate. *NMR in Biomedicine* n.d.:e3892–n/a.
- 793 [70] Yu L, Yang F, Luo H, Liu FY, Han JS, Xing GG, Wan Y. The role of TRPV1 in different  
794 subtypes of dorsal root ganglion neurons in rat chronic inflammatory nociception induced  
795 by complete Freund’s adjuvant. *Mol Pain* 2008;4. doi:10.1186/1744-8069-4-61.
- 796 [71] Zhang R-X, Ren K, Dubner R. Osteoarthritis pain mechanisms: Basic studies in animal  
797 models. *Osteoarthritis and cartilage / OARS, Osteoarthritis Research Society*  
798 2013;21:1308–1315.
- 799 [72] Zhang X, Huang J, McNaughton PA. NGF rapidly increases membrane expression of  
800 TRPV1 heat-gated ion channels. *EMBO J* 2005;24:4211.

- 801 [73] Zhang X, Lee K-Y, Priest BT, Belfer I, Gold MS. Inflammatory mediator-induced  
802 modulation of GABA(A) currents in human sensory neurons. *Neuroscience*  
803 2015;310:401–409.
- 804 [74] Zhou Y, Li G-D, Zhao Z-Q. State-dependent phosphorylation of  $\epsilon$ -isozyme of protein  
805 kinase C in adult rat dorsal root ganglia after inflammation and nerve injury. *Journal of*  
806 *Neurochemistry* 2003;85:571–580.
- 807 [75] Zhu Y, Lu S, Gold MS. Persistent inflammation increases GABA-induced depolarization  
808 of rat cutaneous dorsal root ganglion neurons in vitro. *Neuroscience* 2012;220:330–340.

809

810

811

812

813

814

815 *Figure Legends:*

816 Figure 1: CFA model of acute knee inflammation in mice. A) Experimental timeline indicating  
817 when intra-articular injections, behavioral training and measurements were conducted. B)  
818 Representative picture of CFA injected (ipsilateral) and non-injected (contralateral) knee (shaved  
819 before injections). Arrows indicate where knee width was measured. C) Knee width on the day of  
820 CFA injection (pre) and 24-hours after CFA injection (post) in the ipsilateral (red dots) and  
821 contralateral (black dots) knee (n =17). \*\*\*\* indicates  $p < 0.0001$ , paired t-test. Plots of (D) time  
822 spent digging and (E) the number of visible burrows after a 3-minute digging test (n = 7). \*  
823 indicates  $p < 0.05$ , \*\* indicates  $p < 0.01$ , repeated measures ANOVA, Holm-Sidak multiple  
824 comparison test. Error bars indicate S.D.

825

826 Figure 2: Action potential properties of knee neurons following acute knee inflammation. A)  
827 Evoked action potential from a knee neuron in response to a 700 pA current injection for 80 ms.  
828 Example of a labeled knee neuron (blue arrow) and an unlabeled neuron (white arrow) shown in  
829 inset. B) Frequency distribution of neuronal diameter in  $\mu\text{m}$  of CFA (red,  $n = 25$ ) and Cntrl (black,  
830  $n = 27$ ) neurons. C-E) Distribution of threshold (C), half peak duration (HPD) (D) and  
831 afterhyperpolarization (AHP) (E) after 4-hours in culture. Error bars indicate S.D, \* indicates  $p <$   
832  $0.05$ , \*\* indicates  $p < 0.01$ , unpaired t-test.

833

834 Figure 3: Acid sensitivity of knee neurons after acute inflammation. A) Percentage frequency of  
835 transient + sustained vs. sustained only response to pH 6 (transient + sustained, light yellow;  
836 sustained, dark yellow) and pH 5 (transient + sustained, light orange; sustained, orange) B)  
837 Example traces of transient + sustained acid currents in response to pH 6 (light yellow) and pH 5  
838 (light orange). C) Example traces of sustained response to pH 7 (purple), pH 6 (dark yellow) and  
839 pH 5 (orange). D-F) Peak current density of sustained pH 7 ( $n = 19, 23$ ), pH 6 ( $n = 23, 25$ ) and  
840 pH 5 ( $n = 20, 23$ ) responses (CFA: red dots, Cntrl: black dots).

841

842 Figure 4: TRP agonist response profile of knee neurons following acute knee inflammation.  
843 Representative traces of 10  $\mu\text{M}$  capsaicin (pink, Ai), 100  $\mu\text{M}$  cinnamaldehyde (brown, Bi) and  
844 100  $\mu\text{M}$  menthol (green, Ci) response from a CFA neuron and their respective percentage  
845 frequency (Aii, Bii, Cii). The numbers above the bars indicate the number of responsive neurons.  
846 D) Heat map of Cntrl (i,  $n = 27$ ) and CFA (ii,  $n = 25$ ) neurons responding to capsaicin,

847 cinnamaldehyde and menthol. E (i) Representative images of a whole DRG section from L4  
848 showing fast blue (FB) labeling from the knee (blue), TRPV1 expression (magenta), TrkA  
849 expression (green) and a merged image. White arrowhead shows a knee neuron that only expresses  
850 TrkA, white arrowhead with asterisk shows a knee neuron that expresses only TRPV1 and white  
851 arrow shows a knee neuron that co-expresses TRPV1 and TrkA. (ii) Proportion of knee neurons  
852 (L2-L5) that express TRPV1 (magenta), TrkA (green) and both TRPV1 and TrkA (green and  
853 magenta stripes) from Cntrl (n = 1334) and CFA (n = 1089) injected side. Numbers above the bars  
854 represent neurons stained positive with respective antibodies. \* indicates  $p < 0.05$ , \*\*\*\* indicates  
855  $p < 0.0001$ , chi-sq test.

856

857 Figure 5: GABA-evoked currents from knee neurons after acute inflammation. A) Representative  
858 traces of 100  $\mu$ M GABA-evoked currents showing both transient and sustained phases (i, ii) and  
859 currents with only a sustained phase (iii). B (i) Percentage frequency of GABA-evoked transient  
860 + sustained currents (black bars), sustained currents (striped bars) and non-responders (grey bars)  
861 in Cntrl and CFA neurons. (ii) Peak current density of all GABA-evoked currents (Cntrl: n = 26,  
862 CFA: 19) and (iii) GABA-evoked currents split into TS and S type (Cntrl: n = 12, 14, black dots;  
863 CFA: n = 12, 7, red dots). TS = transient + sustained currents, S = sustained only currents, error  
864 bars indicate S.D, \* indicates  $p < 0.05$ , unpaired t-test. C) i - Example trace of bicuculline block  
865 (blue) of GABA-evoked currents and THIP-evoked current (green) in a single neuron. ii -  
866 percentage frequency of Cntrl (n = 11) and CFA (n = 8) neurons with a GABA response that also  
867 responded to THIP. The numbers above the bars indicate the number of responsive neurons.

868

869 Figure 6: Digging behavior after injection of the TRPV1 antagonist A-425619. A) Experimental  
870 timeline highlighting the days where behavioral testing and injection was performed. Distribution  
871 of time spent digging and the number of burrows in the CFA (B, C, n = 10) and saline group (D,  
872 E, n = 7). \* indicates  $p < 0.05$ , \*\* indicates  $p < 0.01$ , \*\*\* indicates  $p < 0.0001$ . rmANOVA, Holm-  
873 Sidak multiple comparison test. Error bars indicate S.D.

874

875 Supplementary Digital Content 1: Video that shows a mouse digging after FB injection in the knee  
876 (left) and after CFA injection in the knee (right).mp4

877

878 Supplementary Digital Content 2: Figure showing time-in-culture effects on acid, TRP agonist and  
879 GABA sensitivity of knee neurons after inflammation.pdf

880 A) Proportion of Cntrl (left) and CFA (right) neurons responding to pH 6 (yellow) and pH 5  
881 (orange) with a transient + sustained type current (light shade) and sustained only type current  
882 (dark shade) across 4, 24 and 48-hours. B) Percentage frequency of Cntrl (left) and CFA (right)  
883 neurons sensitive to capsaicin (pink), cinnamaldehyde (brown) and menthol (green) across 4, 24  
884 and 48-hours in culture. C) Percentage of Cntrl (left) and CFA (right) neurons that had a sustained  
885 GABA-evoked current across 4, 24 and 48-hours in culture. \* indicates  $p < 0.05$ , chi-sq test. The  
886 numbers above the bars indicate number of responsive neurons.

Table 1: Properties of knee-innervating dorsal root ganglion neurons from the CFA injected side (CFA) and contralateral side (Cntrl) across time-in-culture. \* = significance test of CFA vs Cntrl neurons in the same time group by unpaired t-test, # = significance test of CFA neurons amongst the three time points by ANOVA, ^ = significance test of Cntrl neurons amongst the three time points by ANOVA. \*/#/^ indicates  $p < 0.05$ , \*\*/##/^^ indicates  $p < 0.01$ , \*\*\*/###/^^^ indicates  $p < 0.0001$ .

|                                  | 4-hours         |       |                   |       | 24-hours        |       |                   |       | 48-hours        |       |                   |       |
|----------------------------------|-----------------|-------|-------------------|-------|-----------------|-------|-------------------|-------|-----------------|-------|-------------------|-------|
|                                  | CFA<br>(n = 25) |       | Cntrl<br>(n = 27) |       | CFA<br>(n = 25) |       | Cntrl<br>(n = 22) |       | CFA<br>(n = 23) |       | Cntrl<br>(n = 22) |       |
|                                  | Mean            | S.D.  | Mean              | S.D.  | Mean            | S.D.  | Mean              | S.D.  | Mean            | S.D.  | Mean              | S.D.  |
| RMP (mV)                         | -55.7           | 10.3  | -58.3             | 8.6   | -55.3           | 6.9   | -52.5             | 9.0   | -55.6           | 6.4   | -54.6             | 8.6   |
| Diameter (μm)                    | 31.5            | 3.4   | 31.9              | 2.7   | 31.6            | 3.7   | 32.6              | 4.0   | 29.2            | 4.4   | 29.1              | 5.2   |
| Capacitance (pF)                 | 45.7            | 21.5  | 58.2              | 21.8  | 53.8            | 28.1  | 52.9              | 37.6  | 36.2            | 22.8  | 48.5              | 30.7  |
| Threshold (pA)                   | 384.0           | 221.6 | 550.0*            | 250.8 | 473.6           | 214.3 | 682.7**           | 225.5 | 552.2           | 225.5 | 475.5             | 316.5 |
| Half peak duration<br>(HPD, ms)  | 1.3             | 0.9   | 1.0               | 0.7   | 1.0             | 0.9   | 1.7               | 1.3   | 2.1##           | 1.9   | 2.6^^^            | 2.0   |
| Afterhypolarization<br>(AHP, ms) | 8.6**           | 5.3   | 4.9               | 4.3   | 10.8            | 10.2  | 7.9               | 7.1   | 10.9            | 9.2   | 14.3^^^           | 10.2  |
| Amplitude (mV)                   | 88.2            | 24.2  | 86.2              | 23.7  | 79.3            | 25.4  | 68.3              | 30.0  | 82.7            | 22.2  | 83.1              | 26.0  |



Table 2: Sustained peak current densities of CFA and Cntrl DRG neurons in response to acid, TRP channel agonists (capsaicin, cinnamaldehyde and menthol) and GABA across time-in-culture. \* = significance test of CFA vs. Cntrl neurons by unpaired t-test, # = significance test of CFA neurons amongst the three time points by ANOVA, ^ = significance test of Cntrl neurons amongst the three time points by ANOVA. #/^/\* indicates  $p < 0.05$ , ##/^ ^^ indicates  $p < 0.01$ , ###/^ ^^ indicates  $p < 0.0001$ .

| Treatment      | 4-hours |      |    |         |      |    | 24-hours |      |    |         |      |    | 48-hours |      |    |         |      |    |
|----------------|---------|------|----|---------|------|----|----------|------|----|---------|------|----|----------|------|----|---------|------|----|
|                | CFA     |      |    | Cntrl   |      |    | CFA      |      |    | Cntrl   |      |    | CFA      |      |    | Cntrl   |      |    |
|                | (pA/pF) |      |    | (pA/pF) |      |    | (pA/pF)  |      |    | (pA/pF) |      |    | (pA/pF)  |      |    | (pA/pF) |      |    |
|                | Mean    | S.D. | n  | Mean    | S.D. | n  | Mean     | S.D. | n  | Mean    | S.D. | n  | Mean     | S.D. | n  | Mean    | S.D. | n  |
| pH 7           | 1.0     | 1.0  | 19 | 0.6     | 0.3  | 23 | 4.0###   | 4.6  | 19 | 5.7^^^  | 6.4  | 17 | 1.5      | 1.7  | 15 | 1.5     | 2.7  | 15 |
| pH 6           | 2.6     | 4.2  | 21 | 1.5     | 1.5  | 25 | 4.9      | 5.4  | 21 | 5.3     | 7.2  | 20 | 8.6      | 6.4  | 22 | 4.9     | 8.5  | 19 |
| pH 5           | 5.3     | 10.4 | 20 | 2.3     | 1.5  | 23 | 15.5     | 20.2 | 20 | 14.5^^  | 18.4 | 19 | 7.4      | 6.2  | 19 | 7.9     | 11.6 | 15 |
| Capsaicin      | 4.4     | 11.8 | 18 | 0.8     | 0.4  | 12 | 1.8      | 2.1  | 22 | 4.6     | 6.9  | 11 | 10.3     | 18.4 | 13 | 6.4     | 12.1 | 10 |
| Cinnamaldehyde | 1.1     | 0.8  | 12 | 0.7     | 0.4  | 18 | 2.2      | 1.9  | 19 | 2.3     | 2.5  | 14 | 0.9      | 0.8  | 8  | 2.5     | 4.6  | 5  |
| Menthol        | 0.9     | 0.6  | 11 | 0.9     | 0.7  | 14 | 1.0      | 0.6  | 12 | 1.6     | 1.2  | 9  | 1.2      | 2.0  | 8  | 2.8     | 3.8  | 3  |
| GABA           | 7.2     | 8.8  | 19 | 3.9     | 5.4  | 26 | 11.8*    | 12.4 | 22 | 4.3     | 3.9  | 19 | 8.3      | 11.7 | 18 | 4.3     | 6.7  | 16 |

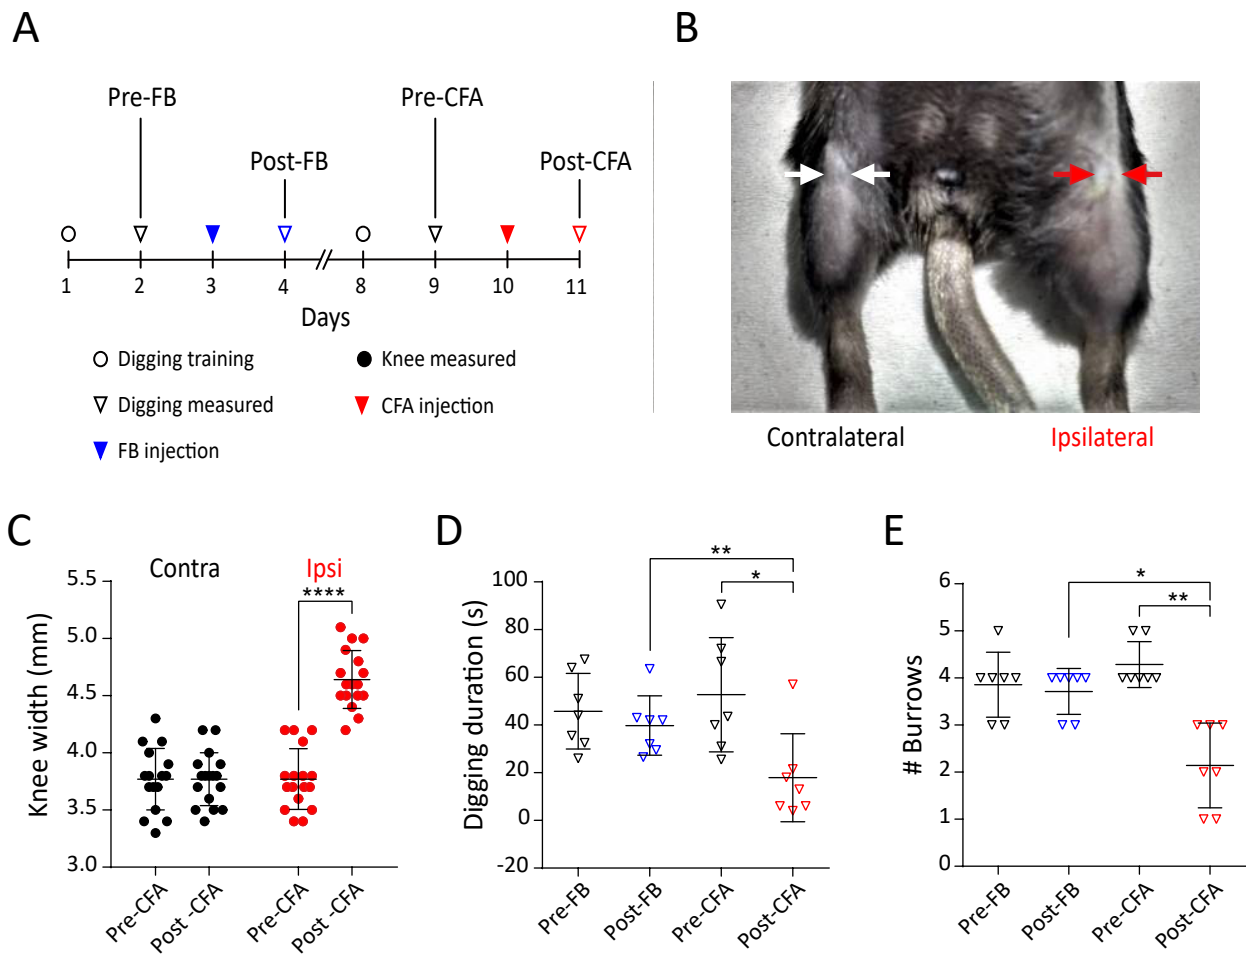

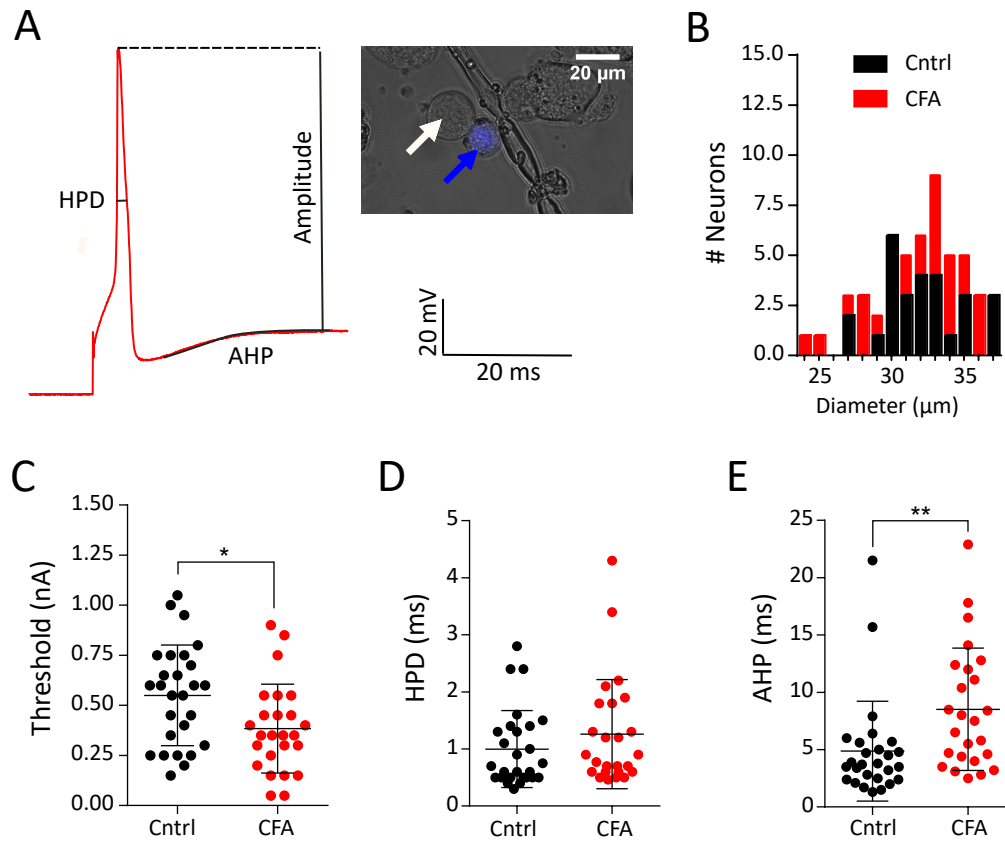

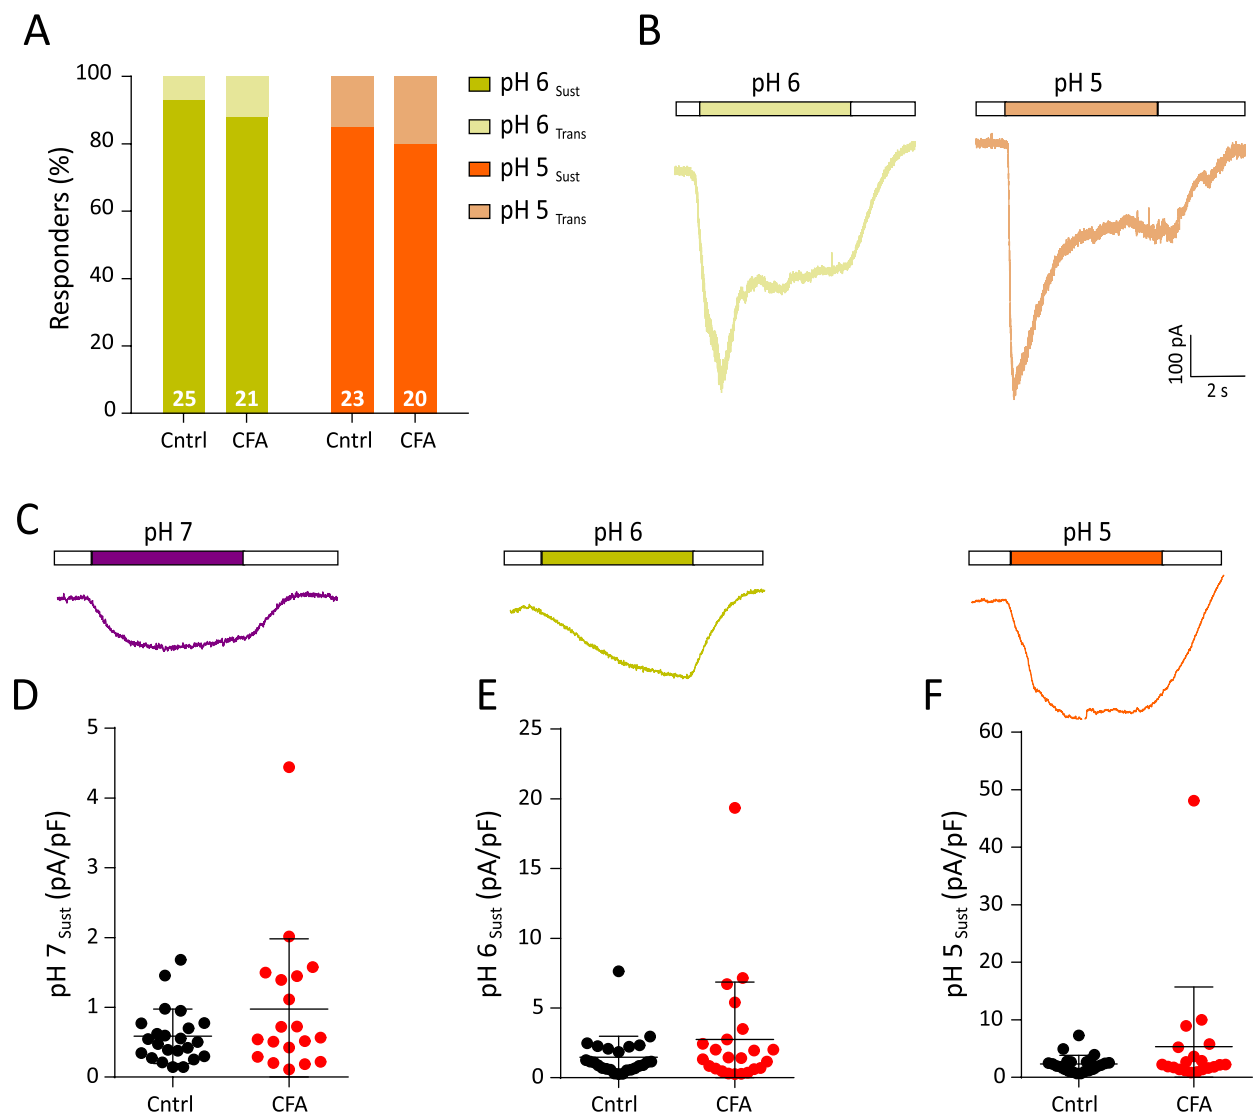

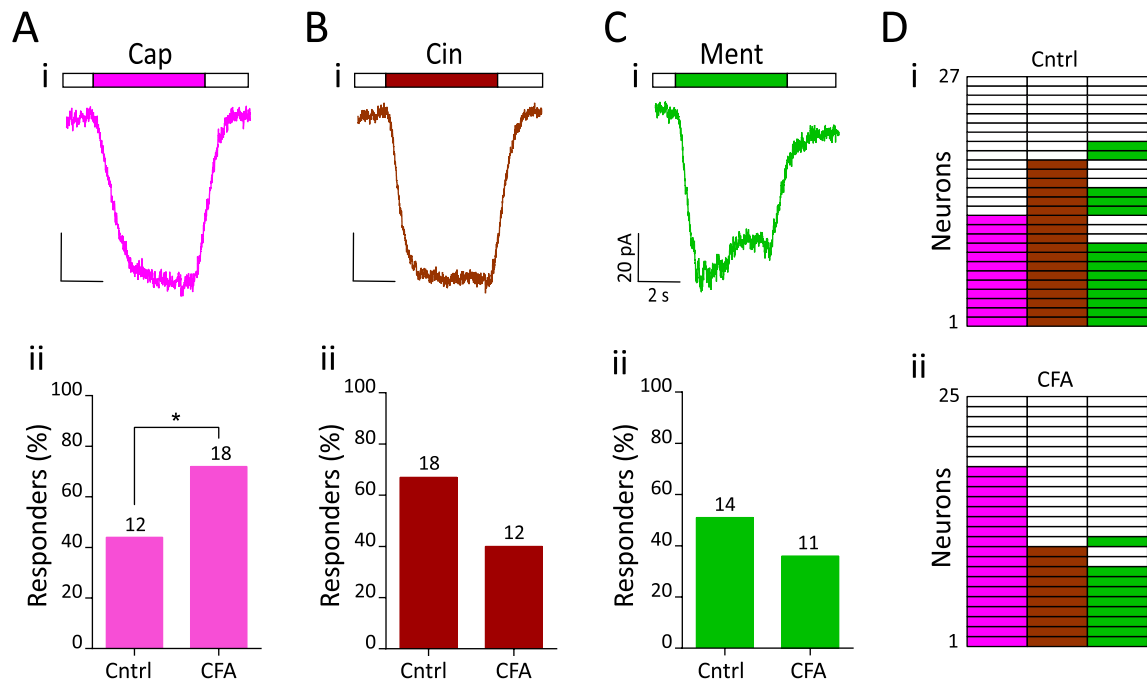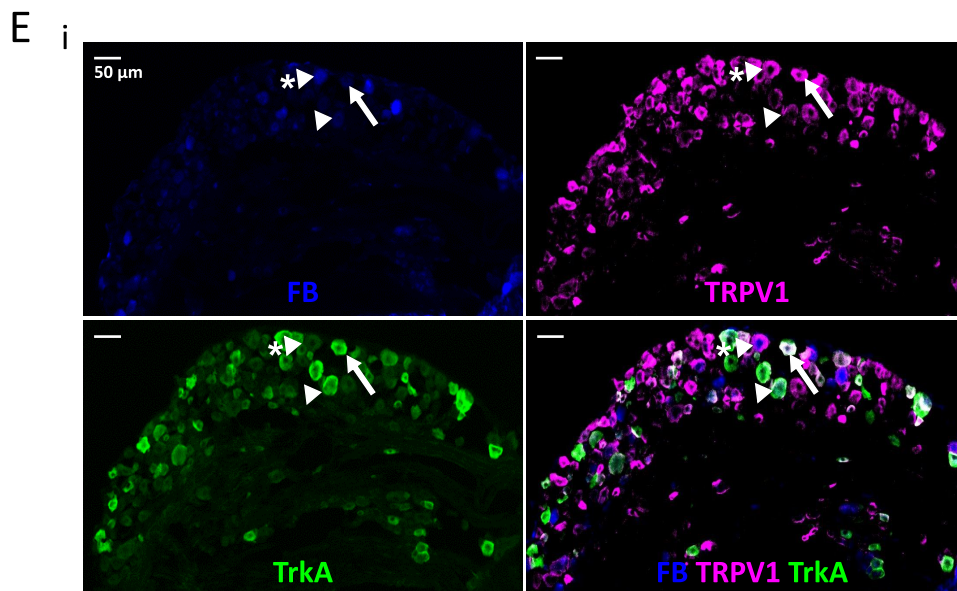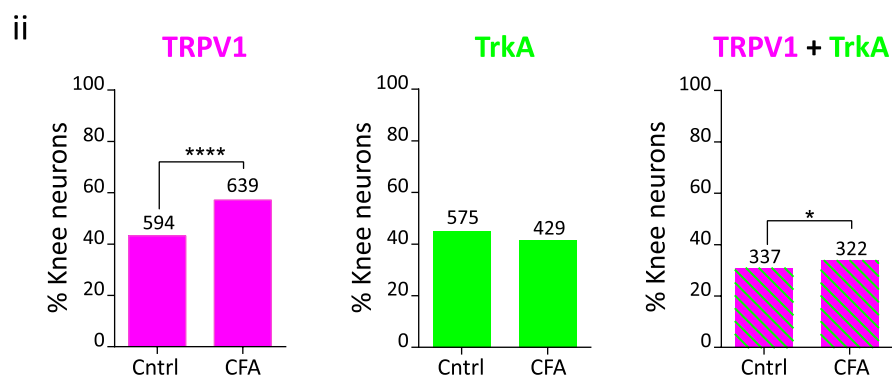

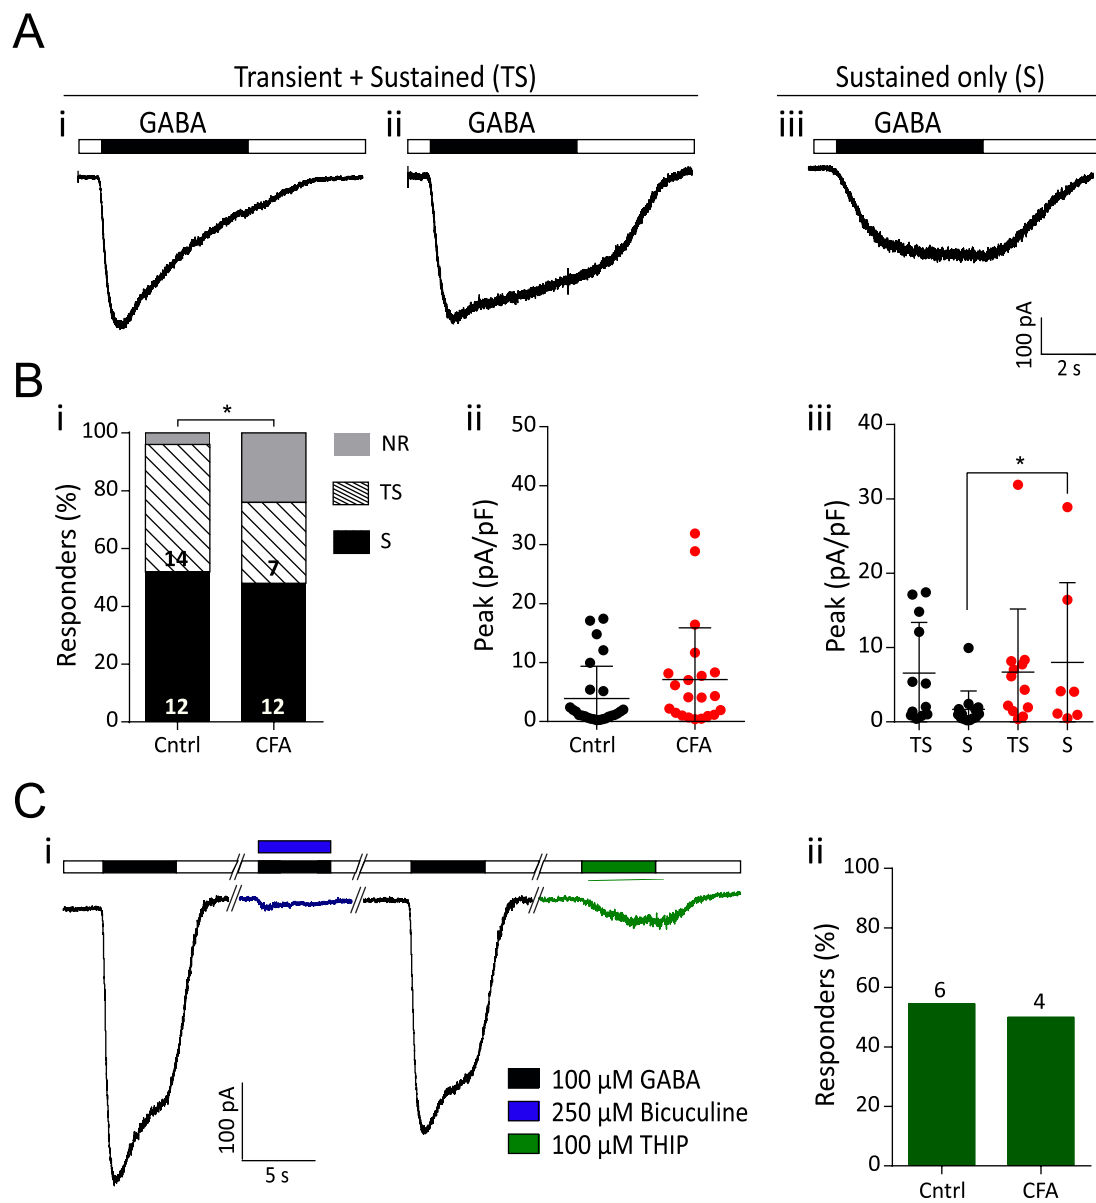

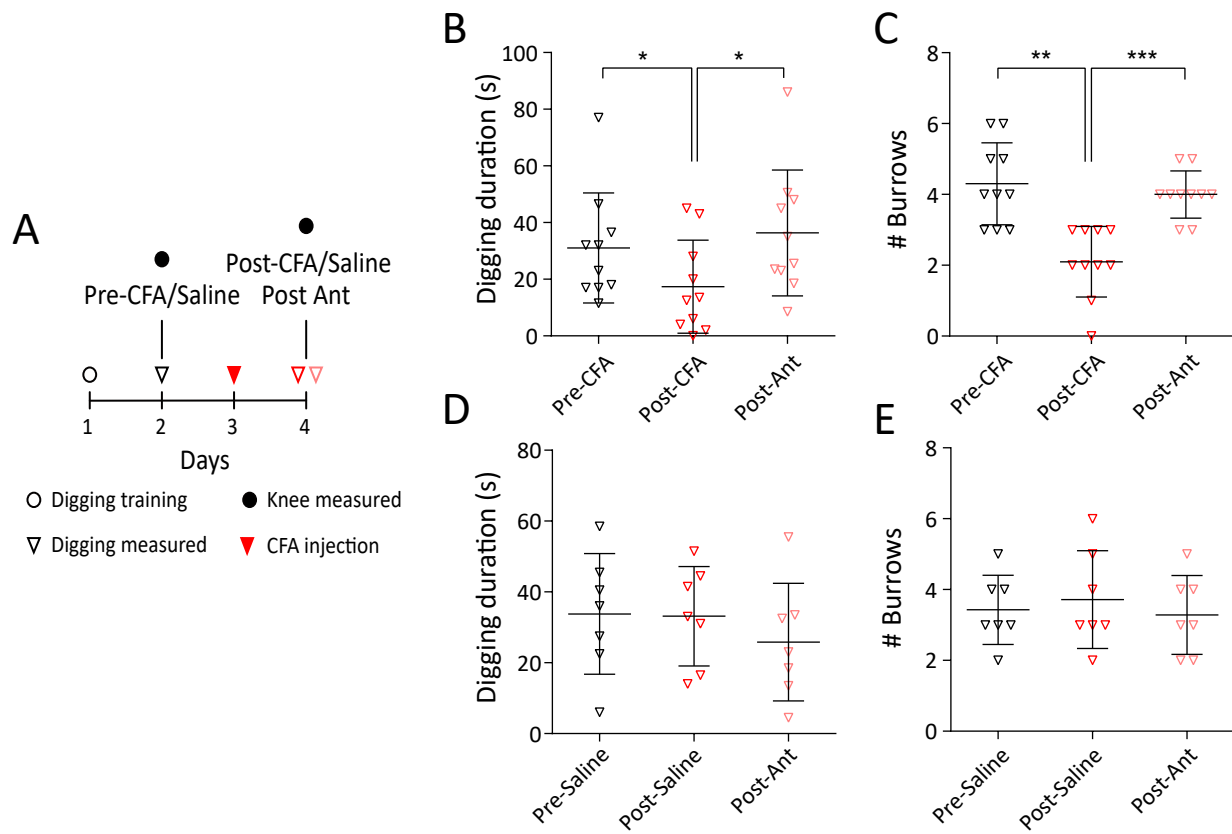

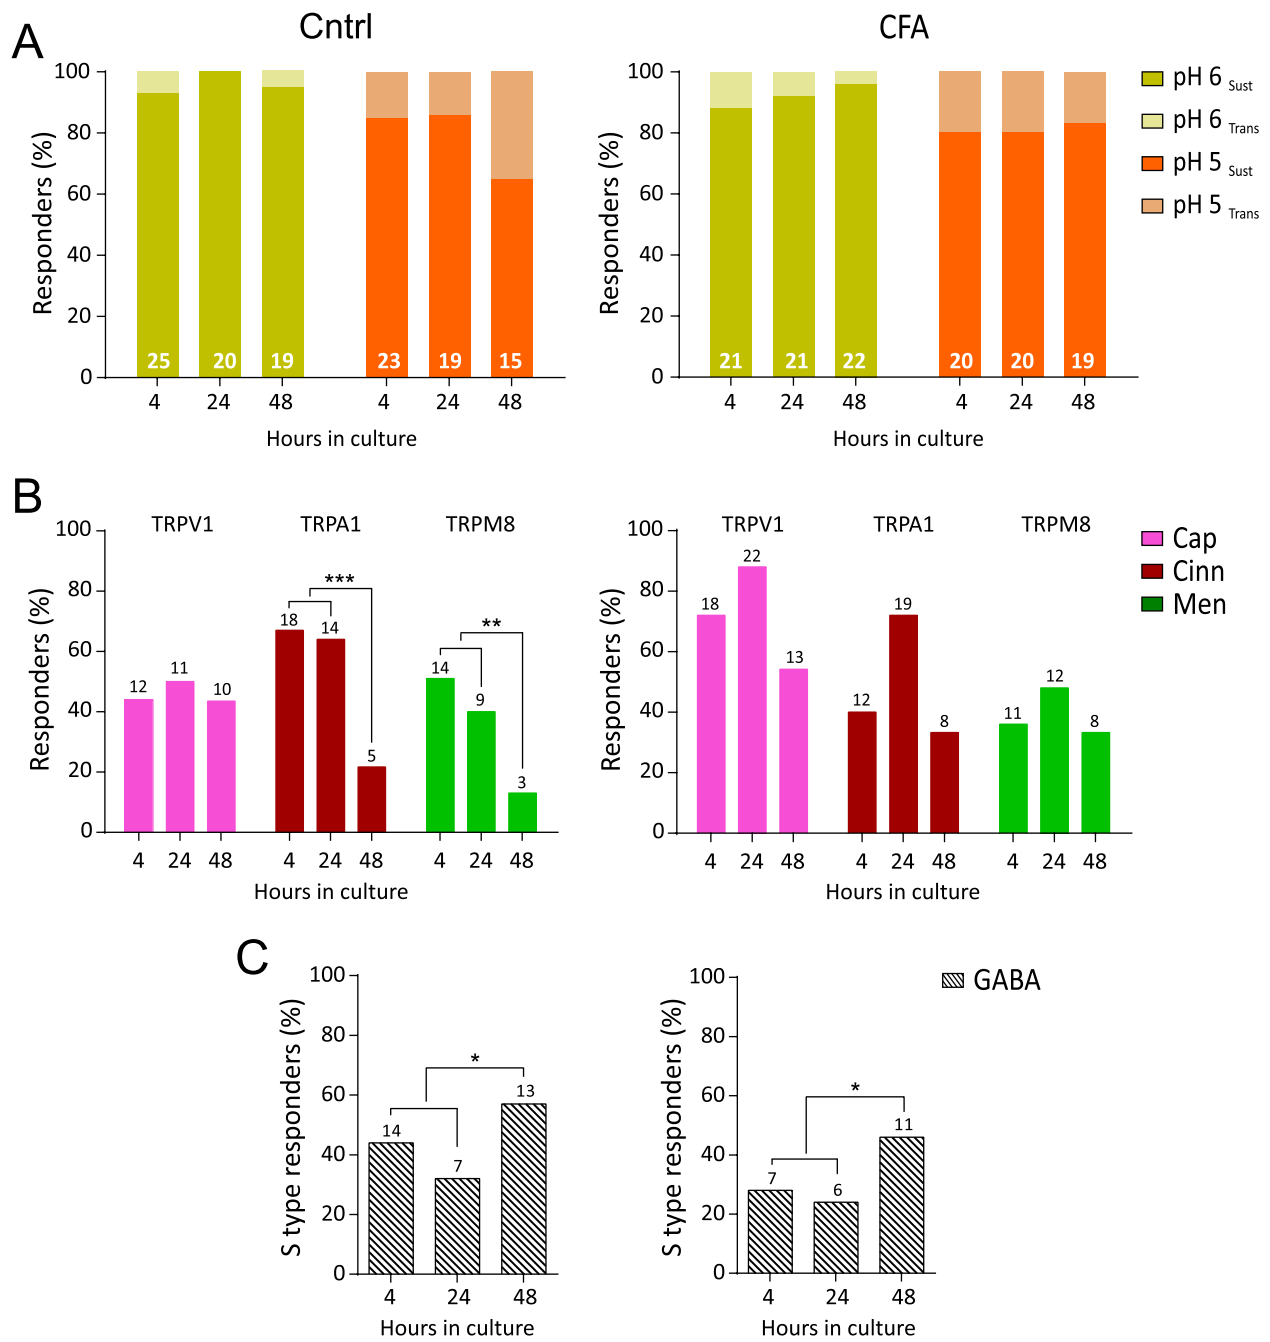

Source: https://www.biorxiv.org/content/10.1101/350637v1.full.pdf
